# Supplementary material for: Metal-free aerobic oxidative C–N bond cleavage of tertiary amines for the synthesis of N-heterocycles with high atom efficiency
Source: Royal Society of Chemistry journal article supplement (doi:10.1039/c4ob00578c), 2014-01-01

## Supporting Information

### **Metal-Free Aerobic Oxidative C-N Bond Cleavage of Tertiary Amines for the Synthesis of *N*-Heterocycles with High Atom Efficiency**

Xiuling Chen, Tieqiao Chen, Yongbo Zhou,\* Daoqing Han, Li-Biao Han, and Shuang-Feng Yin\*

<sup>a</sup> State Key Laboratory of Chemo/Biosensing and Chemometrics, College of Chemistry and Chemical Engineering, Hunan University, Changsha, 410081, P. R. China  
Fax: (+) 86-731-88821171;  
E-mail: zhouyb@hnu.edu.cn; sf\_yin@hnu.edu.cn

## Contents

|                                                           |              |
|-----------------------------------------------------------|--------------|
| General remarks                                           | <b>3</b>     |
| General procedure                                         | <b>3</b>     |
| Optimization of the reaction conditions                   | <b>3</b>     |
| Metal-free verification and other relative experiments    | <b>4-5</b>   |
| Investigation on the reaction mechanism                   | <b>5-9</b>   |
| $^1\text{H}$ NMR and $^{13}\text{C}$ NMR data of products | <b>9-11</b>  |
| References                                                | <b>12</b>    |
| Copies of $^1\text{H}$ and $^{13}\text{C}$ NMR spectra    | <b>13-34</b> |

## 1. General remarks

All non-aqueous reactions and manipulations were performed in oxygen atmosphere. The reactions were monitored by GC and GC-MS. The  $^1\text{H}$  NMR and  $^{13}\text{C}$  NMR spectra were recorded on a Bruker ADVANCE III spectrometer at 400 MHz and 100 MHz, respectively, and chemical shifts were reported in parts per million (ppm). Flash column chromatography was performed using silica gel 200-300 mesh, GC-MS results were recorded on GC-MS QP2010, and GC analysis was performed on GC 7820A. Amines **1** were purchased from Energy Chemical, Alfa Aesar, Aladdin or Maya Reagent; amines **2** were purchased from Aladdin.

## 2. General experimental procedure for the synthesis of *N*-heterocycle derivatives

A 10 ml Schlenk-type tube equipped with a magnetic stir bar was charged with substrate amine **1** (**1a-1f**) (0.2 mmol) and acid (20 mol%). The reaction tube was evacuated and back-filled with  $\text{O}_2$ . Under oxygen atmospheres, tertiary amines **2** (0.08 mmol), secondary amines **2** (0.12 mmol), primary amines **2** (0.24 mmol) and dioxane (1 mL) were added at room temperature, then the reaction mixture was stirred at 115-130 °C for 10-18 h, recharging oxygen after 9 h. The reaction was monitored by GC or GC-MS. After completion of the reaction, the resulting solution was cooled to room temperature, and washed with saturated  $\text{NaHCO}_3$  solution. The product was extracted with EtOAc or  $\text{CHCl}_3$ , dried over anhydrous  $\text{Na}_2\text{SO}_4$  and concentrated in vacuo. The crude product was purified by flash column chromatography on silica gel to give **analytically pure** product.

## 3. Optimization of the reaction conditions<sup>a</sup>

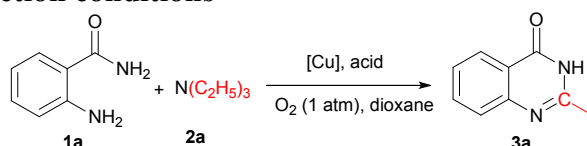

| Entry           | Catalyst (10 mol%)        | Acid (20 mol%)                                  | T (° C) | Time (h) | Yield (%) <sup>b</sup> |
|-----------------|---------------------------|-------------------------------------------------|---------|----------|------------------------|
| 1               | $\text{Cu}(\text{OAc})_2$ | $\text{CH}_3\text{COOH}$                        | 120     | 13       | 55                     |
| 2               | $\text{Cu}(\text{OAc})_2$ | $\text{C}_6\text{H}_5\text{COOH}$               | 120     | 13       | 37                     |
| 3               | $\text{Cu}(\text{OAc})_2$ | $\text{C}_6\text{H}_5\text{CH}_2\text{COOH}$    | 120     | 13       | 35                     |
| 4               | $\text{Cu}(\text{OAc})_2$ | $\text{C}_6\text{H}_5\text{SO}_3\text{H}$       | 120     | 13       | 55                     |
| 5               | $\text{Cu}(\text{OAc})_2$ | $\text{Ph}_2\text{P}(\text{O})\text{OH}$        | 120     | 13       | 64                     |
| 6               | $\text{CuCl}_2$           | $\text{Ph}_2\text{P}(\text{O})\text{OH}$        | 120     | 13       | 69                     |
| 7               | $\text{CuCl}$             | $\text{Ph}_2\text{P}(\text{O})\text{OH}$        | 120     | 13       | 71                     |
| 8               | $\text{CuI}$              | $\text{Ph}_2\text{P}(\text{O})\text{OH}$        | 120     | 13       | 35                     |
| 9               | $\text{CuBr}_2$           | $\text{Ph}_2\text{P}(\text{O})\text{OH}$        | 120     | 13       | 68                     |
| 10              | $\text{CuBr}$             | $\text{Ph}_2\text{P}(\text{O})\text{OH}$        | 120     | 13       | 72                     |
| 11              | $\text{Cu}$               | $\text{Ph}_2\text{P}(\text{O})\text{OH}$        | 120     | 13       | 71                     |
| 12              | $\text{CuSO}_4$           | $\text{Ph}_2\text{P}(\text{O})\text{OH}$        | 120     | 13       | 76                     |
| 13              | $\text{Cu}(\text{OAc})_2$ | $\text{Ph}_2\text{P}(\text{O})\text{OH}$        | 130     | 13       | 82                     |
| 14              | $\text{Cu}(\text{OAc})_2$ | $\text{Ph}_2\text{P}(\text{O})\text{OH}$        | 130     | 18       | 88                     |
| 15              | $\text{Cu}(\text{OAc})_2$ | --                                              | 130     | 18       | 25                     |
| 16              | --                        | $\text{Ph}_2\text{P}(\text{O})\text{OH}$        | 130     | 13       | 76                     |
| 17              | --                        | $\text{Ph}_2\text{P}(\text{O})\text{OH}$        | 130     | 18       | 90                     |
| 18              | --                        | $\text{CH}_3\text{COOH}$                        | 130     | 18       | 88                     |
| 19              | --                        | $\text{PhCH}_2\text{COOH}$                      | 130     | 18       | 61                     |
| 20              | --                        | $\text{PhCOOH}$                                 | 130     | 18       | 71                     |
| 21              | --                        | <i>p</i> -MePhCOOH                              | 130     | 18       | 60                     |
| 22              | --                        | <i>p</i> -NO <sub>2</sub> PhCOOH                | 130     | 18       | 51                     |
| 23              | --                        | $\text{C}_{10}\text{H}_7\text{CH}_2\text{COOH}$ | 130     | 18       | 65                     |
| 24              | --                        | $\text{PhSO}_3\text{H}$                         | 130     | 18       | 88                     |
| 25              | --                        | --                                              | 130     | 18       | 27                     |
| 26 <sup>c</sup> | --                        | $\text{Ph}_2\text{P}(\text{O})\text{OH}$        | 130     | 18       | 91                     |
| 27 <sup>d</sup> | --                        | $\text{Ph}_2\text{P}(\text{O})\text{OH}$        | 130     | 18       | 61                     |
| 28 <sup>e</sup> | --                        | $\text{Ph}_2\text{P}(\text{O})\text{OH}$        | 130     | 18       | 15                     |
| 29 <sup>f</sup> | --                        | $\text{Ph}_2\text{P}(\text{O})\text{OH}$        | 130     | 18       | -                      |

<sup>a</sup> Reaction conditions: *o*-aminobenzamide **1a** (0.2 mmol),  $\text{NEt}_3$  **2a** (0.08 mmol), [Cu] (10 mol%), acid (20 mol%) based on **1a**, dioxane (1.0 mL),  $\text{O}_2$  (1 atm) in a 10 mL Schlenk tube, recharging oxygen after 9 h. <sup>b</sup> GC yield using dodecane as internal standard. <sup>c</sup>  $\text{Ph}_2\text{P}(\text{O})\text{OH}$  (50 mol%). <sup>d</sup>  $\text{Ph}_2\text{P}(\text{O})\text{OH}$  (10 mol%). <sup>e</sup> Under air. <sup>f</sup> Under  $\text{N}_2$

#### 4. Metal-free verification and other relative experiments

The commercial available *o*-aminobenzamide **2a** and Ph<sub>2</sub>P(O)OH was further purified by sublimation under reduced pressure. ICP-AES (Inductively Coupled Plasma-Atomic Emission Spectroscopy, PE optima 5300DV) experiments are shown below. Possible critical transition metals, including Pd, Rh, Co, Cu, Fe, Mg, Ni, were tested. Analysis conditions: nebulizer flow: 0.8L/min; flow aid: 0.8L/min; the cooling gas flow: 15L/min; peristaltic pump speed: 1.5mL/min; equilibration time: 15sec. The results were listed in **Table 1**.

##### 4.1. ICP data

ICP-AES analysis of various metals in reagents

| Element      | <i>o</i> -aminobenzamide <b>1a</b> | <b>1a/2a</b> /dioxane/CH <sub>3</sub> COOH | Ph <sub>2</sub> P(O)OH | detection limit (mg/L) |
|--------------|------------------------------------|--------------------------------------------|------------------------|------------------------|
| Pd (340.458) | ND                                 | ND                                         | ND                     | 0.044                  |
| Rh (343.489) | ND                                 | ND                                         | ND                     | 0.06                   |
| Co (228.616) | ND                                 | ND                                         | ND                     | 0.007                  |
| Cu (224.700) | ND                                 | ND                                         | 0.0076                 | 0.0067                 |
| Fe (238.204) | ND                                 | ND                                         | ND                     | 0.0046                 |
| Mg (280.271) | ND                                 | 0.08                                       | ND                     | 0.0016                 |
| Ni (231.604) | ND                                 | ND                                         | ND                     | 0.015                  |

Unit: µg/g (ppm), ND: Not detected.

##### ICP-AES spectrogram of various metals

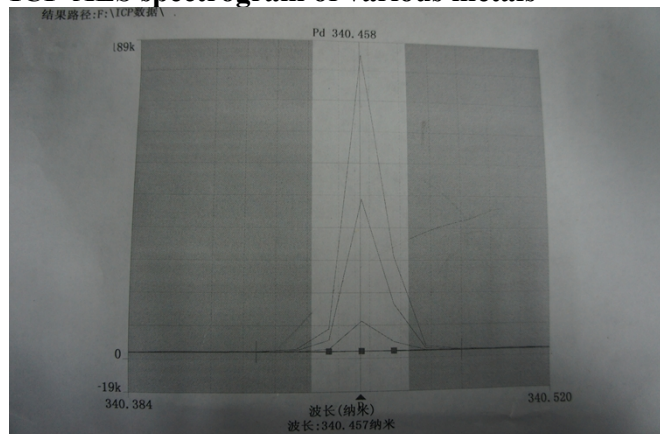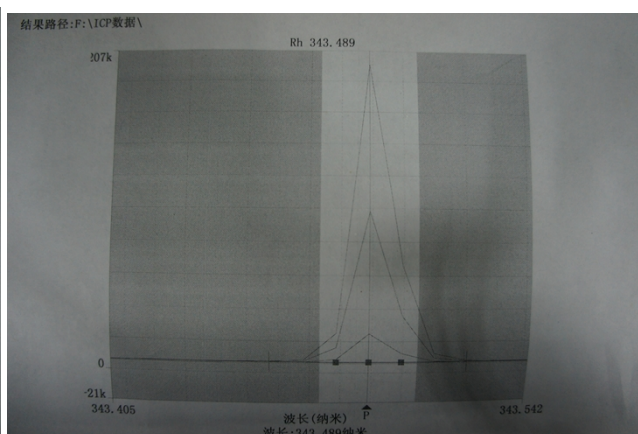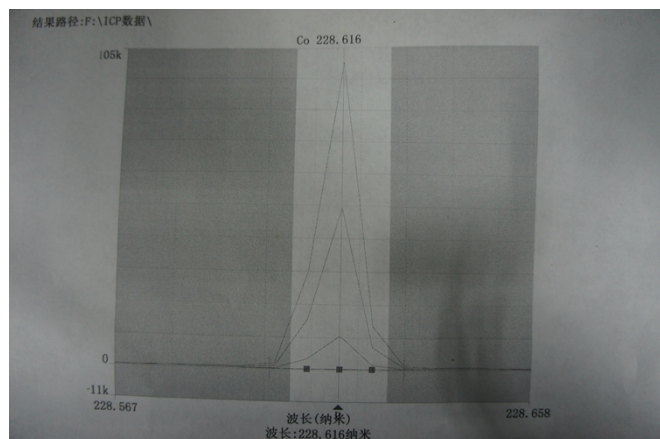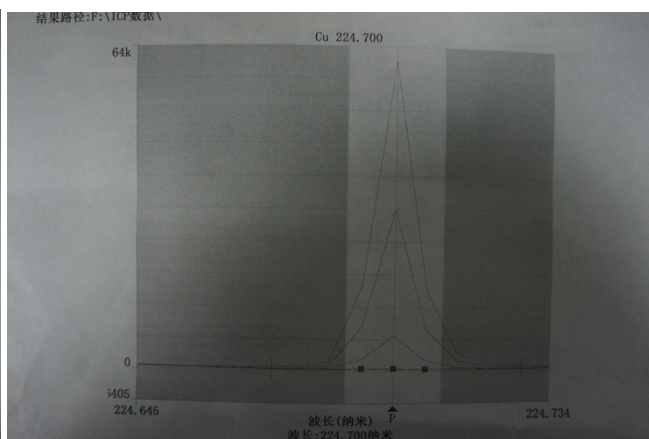

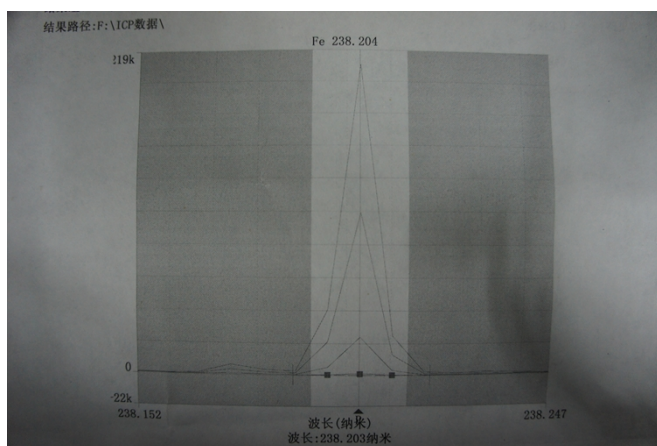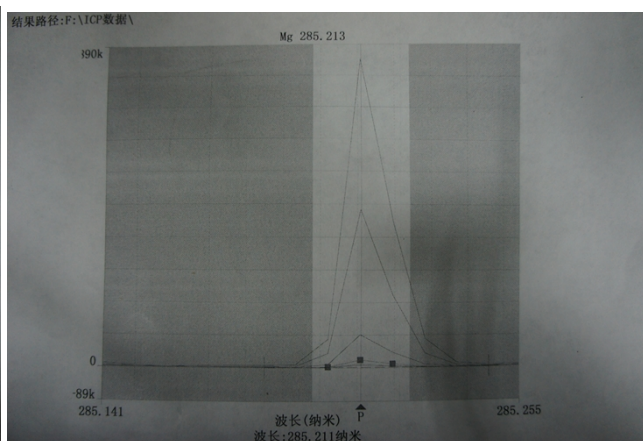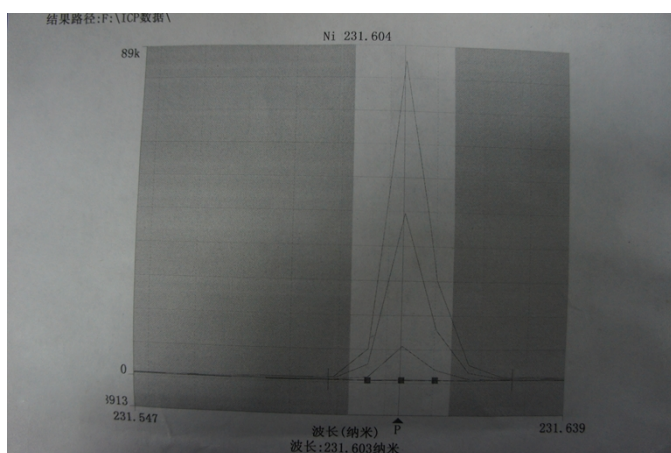

## 4.2 Verification experiments<sup>a</sup>

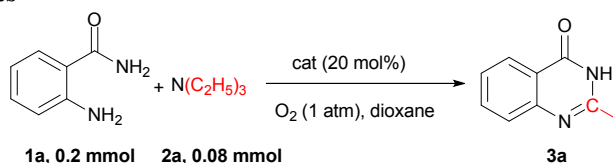

| Entry          | Cat (20 mol%)          | Time (h) | Yield (%) <sup>b</sup> |
|----------------|------------------------|----------|------------------------|
| 1 <sup>c</sup> | Ph <sub>2</sub> P(O)OH | 18       | 90                     |
| 2 <sup>c</sup> | CH <sub>3</sub> COOH   | 18       | 88                     |
| 3 <sup>d</sup> | Ph <sub>2</sub> P(O)OH | 18       | 90                     |
| 4 <sup>d</sup> | CH <sub>3</sub> COOH   | 18       | 88                     |

<sup>a</sup> Reaction conditions: *o*-aminobenzamide **1a** (0.2 mmol), NEt<sub>3</sub> **2a** (0.08 mmol), cat (20 mol%) based on **1a**, dioxane (1.0 mL), O<sub>2</sub> (1 atm) in a 10 mL Schlenk tube, **recharging oxygen after 9 h**. <sup>b</sup> GC yield using dodecane as internal standard. <sup>c</sup> Ph<sub>2</sub>P(O)OH, CH<sub>3</sub>COOH, dioxane and NEt<sub>3</sub> were used without purification. <sup>d</sup> Ph<sub>2</sub>P(O)OH was purified by sublimation prior to examination; CH<sub>3</sub>COOH, dioxane and NEt<sub>3</sub> were purified by distillation prior to examination.

## 5. Investigation on the reaction mechanism

(a) The reaction of *o*-aminobenzamide **1a** with *N,N*-diethylbenzamide was conducted under similar reaction conditions, **3a** was obtained in 55% yield, while **3e** was not detected (eq. 1). When *o*-aminobenzamide **1a** and 1.0 equiv tri-*n*-butylamine **2c** were used as substrates at 25 °C, 20% tri-*n*-butylamine *N*-oxide **I<sub>2c</sub>** was isolated and 75% tri-*n*-butylamine **2c** was recovered (eq. 2). The resulting tri-*n*-butylamine *N*-oxide **I<sub>2c</sub>** was found to react with *o*-aminobenzamide **1a** under N<sub>2</sub> atmosphere, producing the corresponding quinazolinone derivatives **3c** in high yield (eq. 3). Besides, the addition of a radical inhibitor, 2,2,6,6-tetramethyl piperidinyloxyl (TEMPO), did not affect the yield of **3a** (eq. 4). During the reaction of *o*-aminobenzamide with 1.2 equiv tri-*n*-octylamine, secondary amine and aldehyde were detected by GC-MS (eq. 5). In the presence of 20 mol% Ph<sub>2</sub>P(O)OH, tri-*n*-octylamine and tribenzylamine could be readily oxidized by dioxygen and the corresponding aldehydes were provided in 56% and 50% yields, respectively (eq. 6). In the absence of Ph<sub>2</sub>P(O)OH, the reaction of benzaldehyde with *o*-aminobenzamide **1a** took place smoothly and the product 2-phenylquinazolin-4(3*H*)-one was produced in 97% yield (eq. 7). According to referees' comments, peroxyacids are very well known to oxidize tertiary amines to *N*-oxides, so the oxidative cyclocondensation of *o*-aminobenzamide **1a** with tri-*n*-butylamine **2c** was performed using *m*-cpba (3-chloroperbenzoic acid) as oxidant instead of dioxygen, we found this reaction took place smoothly and the corresponding product 2-propylquinazolin-4(3*H*)-one **3c** was given in 93% yield (eq. 8).

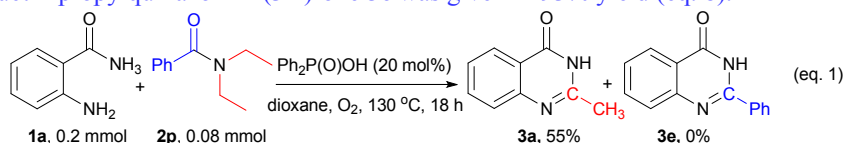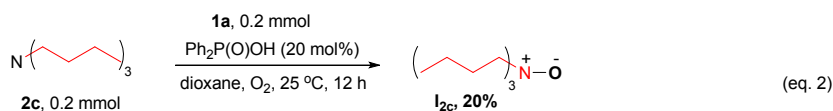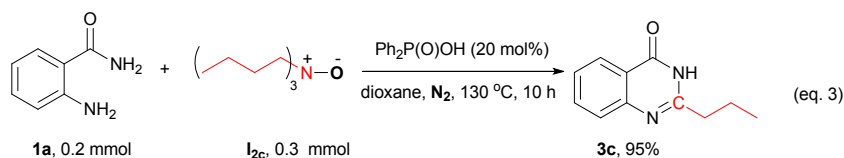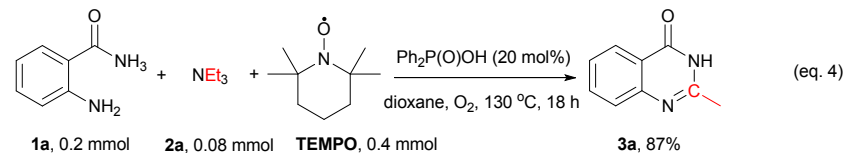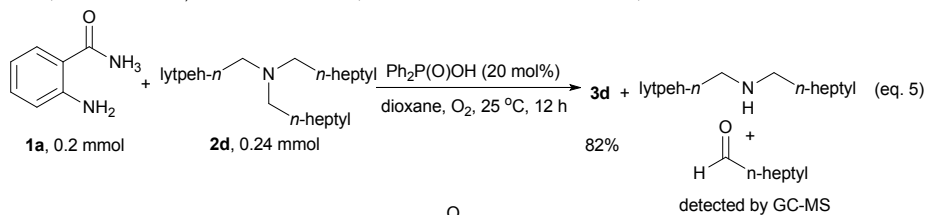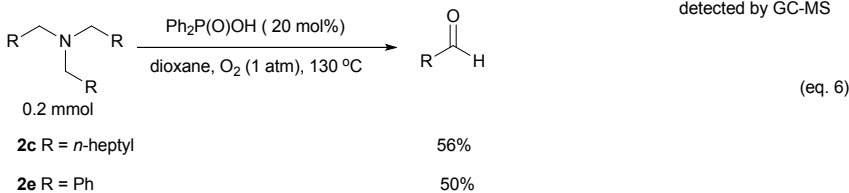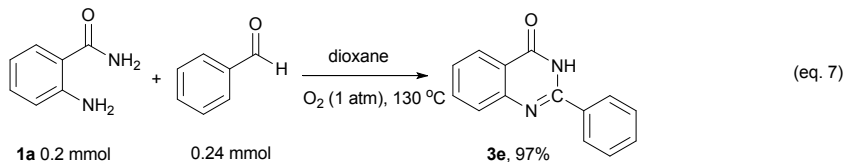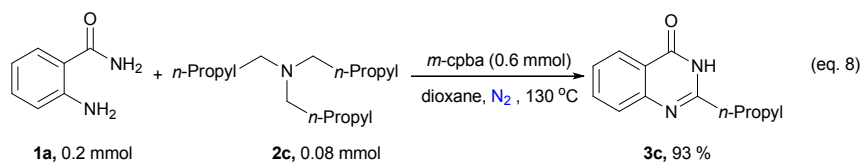

**Tri-*n*-butylamine *N*-oxide (**I<sub>2c</sub>**):** Eluent: methanol/chloroform (1:3) <sup>1</sup>H NMR (400 MHz, CDCl<sub>3</sub>): δ 3.47 (t, *J* = 7.2 Hz, 6H), 1.68 (br, 6H), 1.31 (t, *J* = 6.8 Hz, 6H), 0.87 (t, *J* = 6.8 Hz, 9H); <sup>13</sup>C NMR (100 MHz, CDCl<sub>3</sub>): δ 63.7, 24.6, 19.7, 13.7. MS (ESI, [M+H]<sup>+</sup>) Calcd. for C<sub>12</sub>H<sub>27</sub>NO: 202.2, found : 202.1.

**The ESI full mass spectra of **I<sub>2c</sub>****

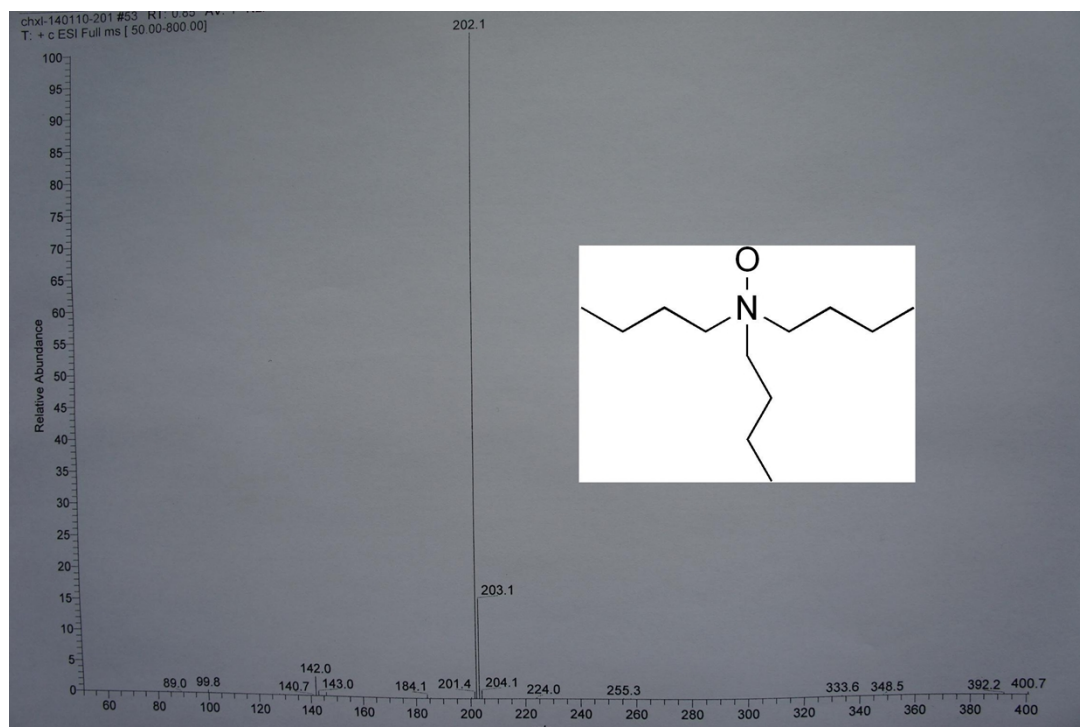

**(b)** Only 25% yield of **3c** was obtained when the copper salt was used as sole catalyst.

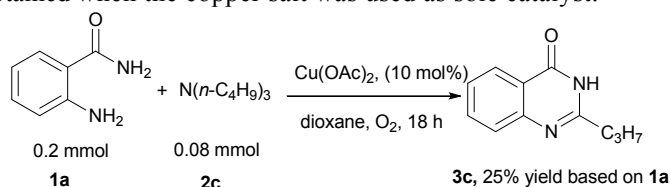

**(c)** Under oxygen atmosphere, *o*-aminobenzamide **1a** can react with triethylamine at 130 °C for 20 h in the presence of 20 mol% Ph<sub>2</sub>P(O)OH as the catalyst in H<sub>2</sub>O, giving the dihydroquinazolinone **3a<sup>1</sup>** in 70% isolated yield. Subsequently, **3a<sup>1</sup>** can be converted to the corresponding quinazolinone **3a** quantitatively using oxygen as the oxidant.

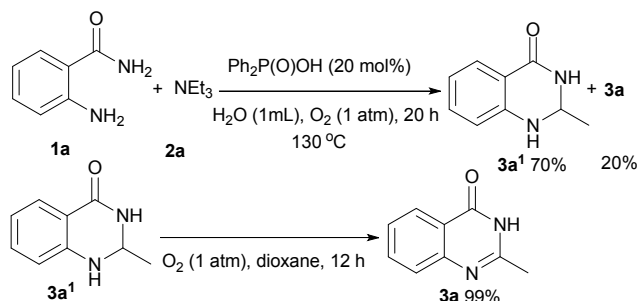

### The experimental procedure for the synthesis of **3a<sup>1</sup>**

A 10 ml Schlenk tube equipped with a magnetic stir bar was charged with *o*-aminobenzamide **1a** (0.5 mmol) and Ph<sub>2</sub>P(O)OH (20 mol%). The reaction tube was evacuated and back-filled with O<sub>2</sub>. Under oxygen atmospheres, NEt<sub>3</sub> **2a** (0.2 mmol) and H<sub>2</sub>O (1 ml) were added at room temperature, and then the reaction mixture was stirred at 130 °C for 20 h. The reaction was monitored by GC or GC-MS. After completion of the reaction, the resulting solution was cooled to room temperature, and neutralized with saturated solution of NaHCO<sub>3</sub>. The product was extracted with EtOAc, dried over Na<sub>2</sub>SO<sub>4</sub>

and concentrated in vacuo. The crude product was purified by flash column chromatography on silica gel. Eluent: petroleum ether/ethyl acetate (5:1). White solid: 56 mg (70%).  $^1\text{H}$  NMR (400 MHz,  $\text{CDCl}_3$ ):  $\delta$  7.86 (d,  $J = 7.6$  Hz, 1H), 7.27-7.31 (m, 1H), 6.89 (s, 1H), 6.85 (t,  $J = 8.0$  Hz, 1H), 6.66 (d,  $J = 8.0$  Hz, 1H), 5.03 (q,  $J = 6.0$  Hz, 1H); 4.33 (s, 1H), 1.50 (d,  $J = 6.0$  Hz, 3H);  $^{13}\text{C}$  NMR (100 MHz,  $\text{CDCl}_3$ ):  $\delta$  165.7, 147.7, 133.8, 128.5, 119.4, 115.9, 114.7, 61.6, 21.7. GC-MS:  $m/z = 162$ .

### $^1\text{H}$ NMR spectra of 2-methyl-2,3-dihydroquinazolin-4(1H)-one ( $3a^1$ )

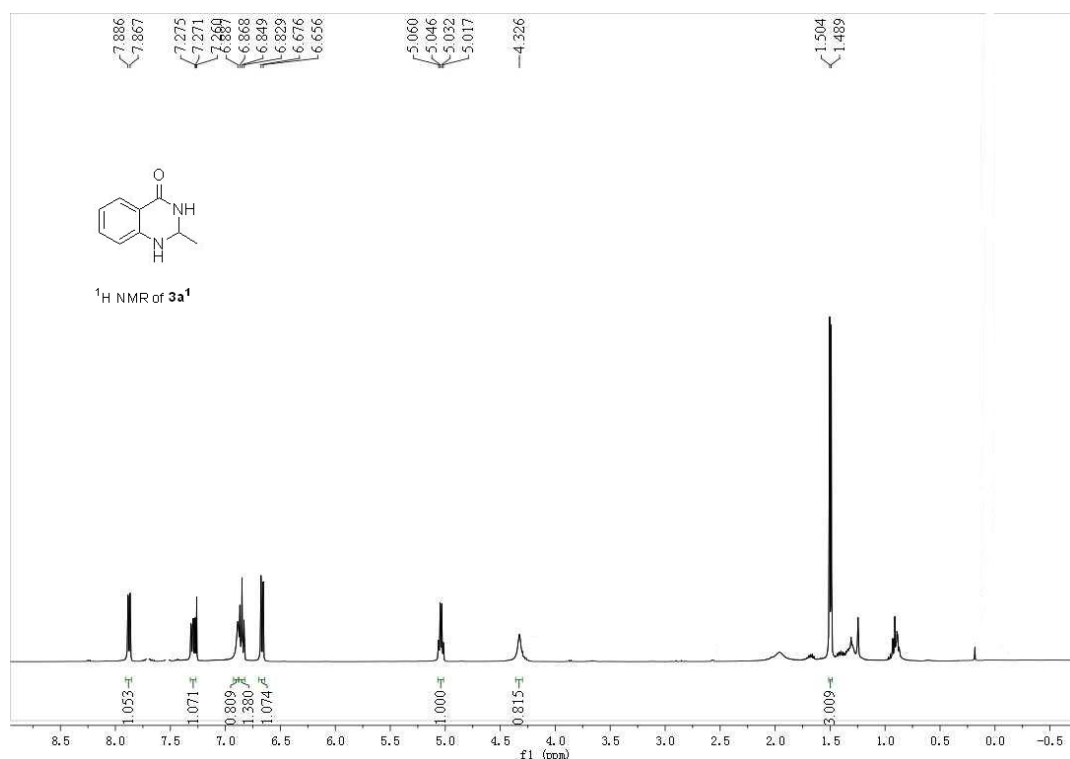

### $^{13}\text{C}$ NMR spectra of 2-methyl-2,3-dihydroquinazolin-4(1H)-one ( $3a^1$ )

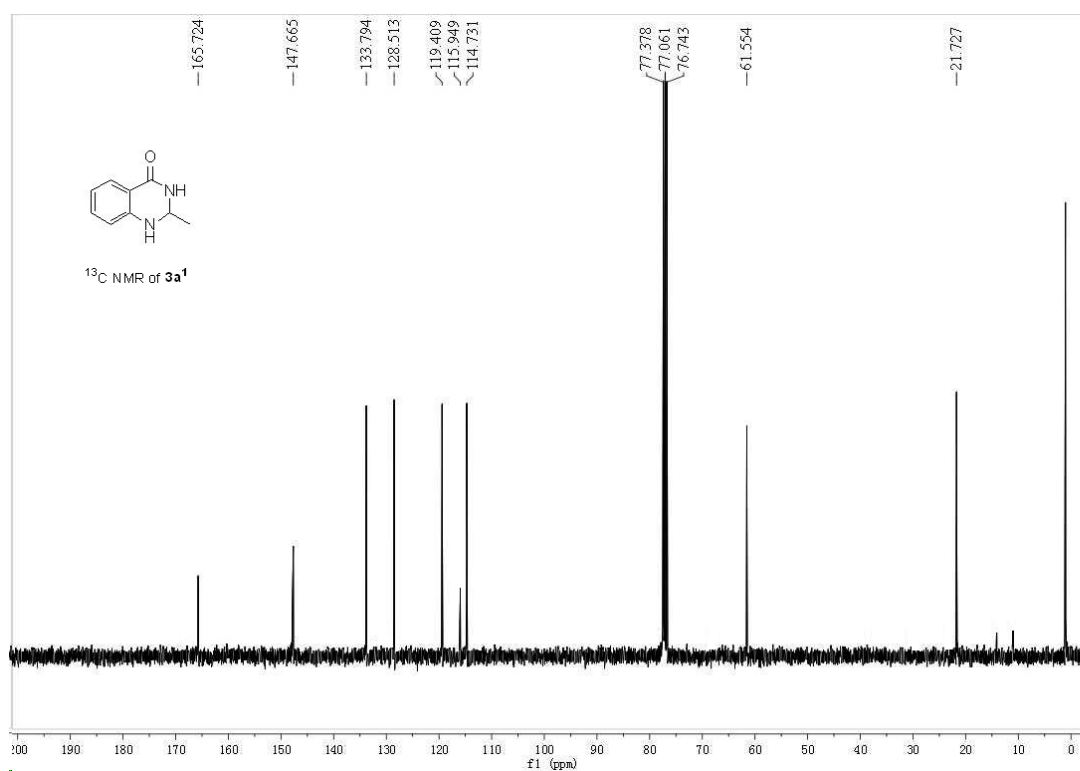



## 6. <sup>1</sup>H NMR and <sup>13</sup>C NMR data of products

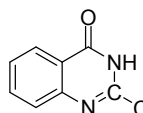

**2-Methylquinazolin-4(3H)-one (3a):** Eluent: petroleum ether/ethyl acetate (2:1). White solid: 26 mg (87%); m.p.: 235-239 °C (lit.<sup>[1]</sup> 238-240 °C). <sup>1</sup>H NMR (400 MHz, CDCl<sub>3</sub>): δ 12.23 (s, br, 1H), 8.30 (d, *J* = 8.0 Hz, 1H), 7.78 (t, *J* = 7.6 Hz, 1H), 7.68 (d, *J* = 8.0 Hz, 1H), 7.48 (t, *J* = 7.6 Hz, 1H), 2.62 (s, 3H); <sup>13</sup>C NMR (100 MHz, CDCl<sub>3</sub>): δ 164.5, 153.4, 149.4, 134.9, 127.0, 126.4, 126.2, 120.2, 22.1. GC-MS: *m/z* = 160.

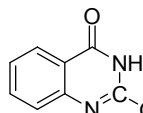

**2-Ethylquinazolin-4(3H)-one (3b):** Eluent: petroleum ether/ethyl acetate (2:1). White solid: 27 mg (80%); m.p.: 231-233 °C (lit.<sup>[2]</sup> 229-231 °C). <sup>1</sup>H NMR (400 MHz, CDCl<sub>3</sub>): δ 11.96 (s, br, 1H), 8.29 (d, *J* = 8.0 Hz, 1H), 7.77 (t, *J* = 7.6 Hz, 1H), 7.70 (d, *J* = 8.0 Hz, 1H), 7.47 (t, *J* = 7.6 Hz, 1H), 2.87 (q, *J* = 7.6 Hz, 2H), 1.46 (t, *J* = 7.2 Hz, 3H); <sup>13</sup>C NMR (100 MHz, CDCl<sub>3</sub>): δ 164.4, 157.7, 149.5, 134.8, 127.2, 126.4, 126.3, 120.5, 29.2, 11.6. GC-MS: *m/z* = 174.

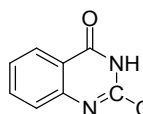

**2-Propylquinazolin-4(3H)-one (3c):** Eluent: petroleum ether/ethyl acetate (2:1). White solid: 29 mg (79%); m.p.: 200-202 °C (lit.<sup>[1]</sup> 198-200 °C). <sup>1</sup>H NMR (400 MHz, CDCl<sub>3</sub>): δ 12.18 (s, br, 1H), 8.28 (d, *J* = 8.0 Hz, 1H), 7.77 (t, *J* = 7.6 Hz, 1H), 7.70 (d, *J* = 8.0 Hz, 1H), 7.47 (t, *J* = 7.6 Hz, 1H), 2.79 (t, *J* = 7.2 Hz, 2H), 1.89-1.98 (m, 2H), 1.08 (t, *J* = 7.2 Hz, 3H); <sup>13</sup>C NMR (100 MHz, CDCl<sub>3</sub>): δ 164.5, 156.9, 149.5, 134.8, 127.2, 126.3, 126.2, 120.5, 37.8, 21.1, 13.8. GC-MS: *m/z* = 188.

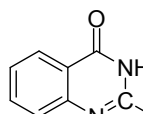

**2-Heptylquinazolin-4(3H)-one (3d):** Eluent: petroleum ether/ethyl acetate (2:1). White solid: 38 mg (81%). m.p.: 140-143 °C (lit.<sup>[3]</sup> 143-145 °C). <sup>1</sup>H NMR (400 MHz, CDCl<sub>3</sub>): δ 12.04 (s, br, 1H), 8.29 (d, *J* = 7.6 Hz, 1H), 7.78 (t, *J* = 7.6 Hz, 1H), 7.70 (d, *J* = 8.0 Hz, 1H), 7.47 (t, *J* = 7.6 Hz, 1H), 2.80 (t, *J* = 8.0 Hz, 2H), 1.85-1.93 (m, 2H), 1.4-1.49 (m, 2H), 1.36-1.42 (m, 2H), 1.29-1.35 (m, 4H), 0.87 (t, *J* = 6.8 Hz, 3H); <sup>13</sup>C NMR (100 MHz, CDCl<sub>3</sub>): δ 164.4, 157.1, 149.5, 134.8, 127.2, 126.3, 126.2, 120.5, 36.0, 31.7, 29.2, 28.9, 27.6, 22.6, 14.1. GC-MS: *m/z* = 244.

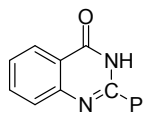

**2-Phenylquinazolin-4(3H)-one (3e):** Eluent: petroleum ether/ethyl acetate (2:1). White solid: 38 mg (86%). m.p.: 236-238 °C (lit.<sup>[4]</sup> 236-237 °C). <sup>1</sup>H NMR (400 MHz, CDCl<sub>3</sub>): δ 11.85 (s, br, 1H), 8.32 (d, *J* = 8.0 Hz, 1H), 8.28 (dd, *J* = 7.2 Hz, 8.0 Hz, 2H), 7.79-7.86 (m, 2H), 7.59 (t, *J* = 8.0 Hz, 3H), 7.51 (t, *J* = 7.2 Hz, 1H); <sup>13</sup>C NMR (100 MHz, CDCl<sub>3</sub>): δ 164.0, 151.8, 149.5, 134.9, 132.8, 131.7, 129.0, 128.0, 127.5, 126.8, 126.4, 120.8. GC-MS: *m/z* = 221.

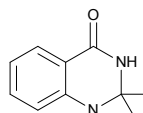

**2,2-Dimethyl-2,3-dihydroquinazolin-4(1H)-one (3f):** Eluent: petroleum ether/ethyl acetate (2:1). White solid: 28 mg (82%). m.p.: 182-184 °C (lit.<sup>[4]</sup> 182-183 °C). <sup>1</sup>H NMR (400 MHz, CDCl<sub>3</sub>): δ 7.87 (d, *J* = 8.0 Hz, 1H), 7.28 (t, *J* = 7.6 Hz, 1H), 6.80 (t, *J* = 7.6 Hz, 1H), 6.78 (s, 1H), 6.62 (d, *J* = 8.0 Hz, 1H), 4.26 (s, 1H), 1.56 (s, 6H); <sup>13</sup>C NMR (100 MHz, CDCl<sub>3</sub>): δ 164.5, 145.9, 133.9, 128.3, 118.7, 114.7, 114.7, 67.7, 29.7. GC-MS: *m/z* = 176.

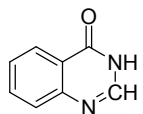

**Quinazolin-4(3H)-one (3g):** Eluent: petroleum ether/ethyl acetate (2:1). White solid: 28 mg (95%); m.p.: 215-216 °C (lit.<sup>[5]</sup>). <sup>1</sup>H NMR (400 MHz, CDCl<sub>3</sub>): δ 11.97 (s, br, 1H), 8.18 (s, 1H), 8.16 (s, 1H), 7.75 (t, *J* = 8.4 Hz, 1H), 7.62 (d, *J* = 8.0 Hz, 1H), 7.30 (s, 3H); <sup>13</sup>C NMR (100 MHz, CDCl<sub>3</sub>): δ 164.8, 150.8, 147.6, 136.8, 129.4, 129.0, 128.6, 125.7. GC-MS: *m/z* = 146.

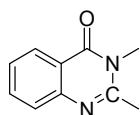

**2,3-Dimethylquinazolin-4(3H)-one (3h):** Eluent: petroleum ether/ethyl acetate (2:1). White solid: 32 mg (91%). m.p.: 106-108 °C (lit.<sup>[2]</sup> 107-109 °C). <sup>1</sup>H NMR (400 MHz, CDCl<sub>3</sub>): δ 8.21 (d, *J* = 8.0 Hz, 1H), 7.68 (t, *J* = 7.6 Hz, 1H), 7.56 (d, *J* = 8.4 Hz, 1H), 7.40 (t, *J* = 7.6 Hz, 1H), 3.59 (s, 1H), 2.59 (s, 3H); <sup>13</sup>C NMR (100 MHz, CDCl<sub>3</sub>): δ 162.3, 154.5, 147.2, 134.2, 126.7, 126.6, 126.4, 120.2, 31.0, 23.6. GC-MS: *m/z* = 174.

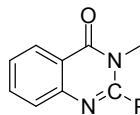

**3-Methyl-2-phenylquinazolin-4(3H)-one (3i):** Eluent: petroleum ether/ethyl acetate (5:1). White solid: 40 mg (87%). m.p.: 132-134 °C (lit.<sup>[6]</sup> 130-132 °C). <sup>1</sup>H NMR (400 MHz, CDCl<sub>3</sub>): δ 8.30 (s, 1H), 7.73 (s, 2H), 7.55-7.57 (m, 2H), 7.47-7.52 (m, 4H), 3.38 (s, 3H); <sup>13</sup>C NMR (100 MHz, CDCl<sub>3</sub>): δ 162.7, 156.1, 147.3, 135.4, 134.3, 130.1, 128.9, 128.0, 127.5, 126.9, 126.7, 120.5, 34.3. GC-MS: *m/z* = 236.

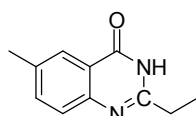

**2-Ethyl-6-methylquinazolin-4(3H)-one (3j):** Eluent: petroleum ether/ethyl acetate (4:1). White solid: 30 mg (83%). m.p.: 225-227 °C. <sup>1</sup>H NMR (400 MHz, DMSO-*d*<sub>6</sub>): δ 12.07 (s, br, 1H), 7.86 (s, 1H), 7.57 (d, *J* = 8.4 Hz, 1H), 7.48 (d, *J* = 8.0 Hz, 1H), 2.58 (q, *J* = 7.6 Hz, 2H), 2.41 (s, 3H), 1.22 (t, *J* = 7.6 Hz, 3H); <sup>13</sup>C NMR (100 MHz, DMSO-*d*<sub>6</sub>): δ 162.2, 157.9, 147.4, 136.0, 135.9, 127.1, 125.5, 121.0, 28.2, 21.2, 11.8. HRMS (EI): calcd for C<sub>11</sub>H<sub>12</sub>N<sub>2</sub>O: 188.0950; found: 188.0949.

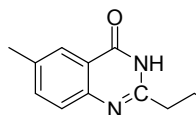

**6-Methyl-2-propylquinazolin-4(3H)-one (3k):** Eluent: petroleum ether/ethyl acetate (4:1). White solid: 33 mg (85%). m.p.: 222-223 °C (lit.<sup>[5]</sup> 225-227 °C). <sup>1</sup>H NMR (400 MHz, DMSO-*d*<sub>6</sub>): δ 12.07 (s, br, 1H), 7.86 (s, 1H), 7.59 (d, *J* = 8.4 Hz, 1H), 7.48 (d, *J* = 8.4 Hz, 1H), 2.55 (t, *J* = 7.6 Hz, 2H), 2.41 (s, 3H), 1.68-1.77 (m, 2H), 0.92 (t, *J* = 7.4 Hz, 3H); <sup>13</sup>C NMR (100 MHz, DMSO-*d*<sub>6</sub>): δ 162.2, 156.8, 147.4, 136.0, 135.9, 127.1, 125.5, 121.0, 36.7, 21.2, 20.7, 14.0. GC-MS: *m/z* = 202.

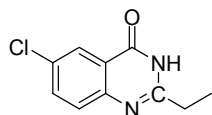

**6-Chloro-2-ethylquinazolin-4(3H)-one (3l):** Eluent: petroleum ether/ethyl acetate (4:1). White solid: 33 mg (81%). m.p.: 255-256 °C. <sup>1</sup>H NMR (400 MHz, DMSO-*d*<sub>6</sub>): δ 12.32 (s, br, 1H), 7.97 (d, *J* = 2.4 Hz, 1H), 7.74 (dd, *J* = 2.4 Hz, 2.4 Hz, 1H), 7.58 (d, *J* = 8.4 Hz, 1H), 2.61 (q, *J* = 7.6 Hz, 2H), 1.22 (t, *J* = 7.6 Hz, 3H); <sup>13</sup>C NMR (100 MHz, DMSO-*d*<sub>6</sub>): δ 161.3, 159.4, 148.1, 134.8, 130.6, 129.5, 125.1, 122.5, 28.0, 11.7. HRMS (EI): calcd for C<sub>10</sub>H<sub>9</sub>ClN<sub>2</sub>O: 208.0403; found: 208.0390.

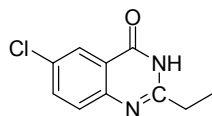

**6-Chloro-2-propylquinazolin-4(3H)-one (3m):** Eluent: petroleum ether/ethyl acetate (4:1). White solid: 36 mg (82%). m.p.: 251-253 °C (lit.<sup>[1]</sup> 248-250 °C). <sup>1</sup>H NMR (400 MHz, DMSO-*d*<sub>6</sub>): δ 12.34 (s, br, 1H), 7.98 (d, *J* = 2.4 Hz, 1H), 7.79 (dd, *J* = 2.4 Hz, 2.8 Hz, 1H), 7.59 (d, *J* = 8.8 Hz, 1H), 2.56 (t, *J* = 7.6 Hz, 2H), 1.68-1.77 (m, 2H), 0.92 (t, *J* = 7.4 Hz, 3H); <sup>13</sup>C NMR (100 MHz, DMSO-*d*<sub>6</sub>): δ 161.3, 158.4, 148.1, 134.8, 130.6, 129.5, 125.1, 122.5, 36.8, 20.6, 13.9. GC-MS: *m/z* = 221.

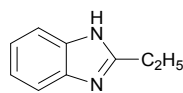

**2-Ethyl-1H-benzo[d]imidazole (3n):** Eluent: petroleum ether/ethyl acetate (20:1). White solid: 25 mg (85%). m.p.: 168-170 °C (lit.<sup>[18]</sup> 170-171 °C). <sup>1</sup>H NMR (400 MHz, CDCl<sub>3</sub>): δ 7.53-7.58 (m, 2H), 7.19-7.25 (m, 2H), 2.99 (q, *J* = 7.6 Hz, 2H), 1.43 (t, *J* = 7.6 Hz, 3H); <sup>13</sup>C NMR (100 MHz, CDCl<sub>3</sub>): δ 156.7, 138.6, 122.1, 114.6, 22.7, 12.5. GC-MS: *m/z* = 146.

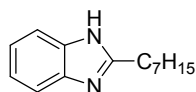

**2-Heptyl-1H-benzo[d]imidazole (3o):** Eluent: petroleum ether/ethyl acetate (20:1). White solid: 38 mg (88%). m.p.: 150-151 °C (lit.<sup>[7]</sup> 147-149 °C). <sup>1</sup>H NMR (400 MHz, CDCl<sub>3</sub>): δ 7.53-7.58 (m, 2H), 7.19-7.25 (m, 2H), 2.97 (t, *J*

= 7.8 Hz, 2H); 1.82-1.89 (m, 2H), 1.25-1.36 (m, 2H), 1.15-1.23 (m, 6H), 0.81 (t,  $J = 7.0$  Hz, 3H);  $^{13}\text{C}$  NMR (100 MHz,  $\text{CDCl}_3$ ):  $\delta$  155.8, 138.6, 122.1, 114.6, 31.7, 29.39, 29.36, 29.0, 28.5, 22.6, 14.1. GC-MS:  $m/z = 216$ .

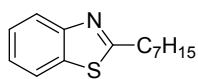

**2-heptylbenzo[d]thiazole (3p):** Eluent: petroleum ether/ethyl acetate (30:1). 38 mg (82%).  $^1\text{H}$  NMR (400 MHz,  $\text{CDCl}_3$ ): 7.53-7.58 (m, 2H), 7.19-7.23 (m, 2H), 2.81 (t,  $J = 8.0$  Hz, 2H), 1.85-1.93 (m, 2H), 1.4-1.49 (m, 2H), 1.36-1.42 (m, 2H), 1.29-1.35 (m, 4H), 0.87 (t,  $J = 6.8$  Hz, 3H);  $^{13}\text{C}$  NMR (100 MHz,  $\text{CDCl}_3$ ):  $\delta$  156.7, 138.6, 122.1, 114.6, 36.0, 31.6, 29.2, 28.9, 27.6, 22.6, 14.0. HRMS (EI): calcd for  $\text{C}_{14}\text{H}_{19}\text{NS}$ : 233.1238; found: 233.1220.

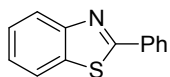

**2-Phenylbenzo[d]thiazole (3q):** Eluent: petroleum ether/ethyl acetate (30:1). White solid: 36 mg (86%). m.p.: 111-112 °C (lit.<sup>[7]</sup> 112-114 °C).  $^1\text{H}$  NMR (400 MHz,  $\text{DMSO}-d_6$ ):  $\delta$  8.13 (t,  $J = 8.0$  Hz, 1H), 8.08-8.10 (m, 3H), 7.53-7.58 (m, 4H), 7.46 (t,  $J = 8.0$  Hz, 1H);  $^{13}\text{C}$  NMR (100 MHz,  $\text{DMSO}-d_6$ ):  $\delta$  166.4, 153.9, 136.5, 135.0, 132.1, 129.9, 129.3, 127.3, 126.2, 123.4, 122.9. GC-MS:  $m/z = 211$ .

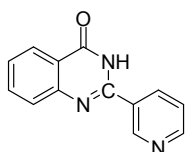

**2-(Pyridin-3-yl)quinazolin-4(3H)-one (3r):** Eluent: petroleum ether/ethyl acetate (2:1). White solid: 41 mg (92%). m.p.: 273-274 °C (lit.<sup>[8]</sup> 275-276 °C).  $^1\text{H}$  NMR (400 MHz,  $\text{DMSO}-d_6$ ):  $\delta$  9.29 (s, 1H), 8.75 (s, 1H), 8.51 (d,  $J = 7.2$  Hz, 1H), 8.16 (d,  $J = 8.0$  Hz, 1H), 7.84 (d,  $J = 7.2$  Hz, 1H), 7.76 (d,  $J = 7.6$  Hz, 1H), 7.64 (s, 1H), 7.55 (d,  $J = 7.2$  Hz, 2H);  $^{13}\text{C}$  NMR (100 MHz,  $\text{DMSO}-d_6$ ):  $\delta$  162.6, 152.3, 151.2, 149.2, 135.9, 135.2, 129.2, 127.9, 127.4, 126.3, 124.0, 121.6. GC-MS:  $m/z = 223$ .

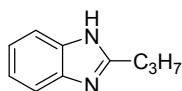

**2-Propyl-1H-benzo[d]imidazole (3s):** Eluent: petroleum ether/ethyl acetate (40:1). White solid: 25 mg (80%). m.p.: 143-145 °C (lit.<sup>[7]</sup> 147-149 °C).  $^1\text{H}$  NMR (400 MHz,  $\text{CDCl}_3$ ):  $\delta$  7.53-7.58 (m, 2H), 7.19-7.25 (m, 2H), 2.99 (t,  $J = 7.6$  Hz, 2H), 1.85-1.95 (m, 2H), 0.97 (t,  $J = 7.6$  Hz, 3H);  $^{13}\text{C}$  NMR (100 MHz,  $\text{CDCl}_3$ ):  $\delta$  155.7, 138.6, 122.1, 114.6, 31.2, 21.8, 13.9. GC-MS:  $m/z = 160$ .

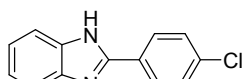

**2-(4-Chlorophenyl)-1H-benzo[d]imidazole (3t):** Eluent: petroleum ether/ethyl acetate (10:1). White solid: 41 mg (90%). m.p.: 292-293 °C (lit.<sup>[7]</sup> 290-291 °C).  $^1\text{H}$  NMR (400 MHz,  $\text{DMSO}-d_6$ ):  $\delta$  13.01 (s, br, 1H), 8.19 (d,  $J = 8.4$  Hz, 2H), 7.62 (d,  $J = 8.4$  Hz, 2H), 7.55 (s, 2H), 7.22 (s, 2H);  $^{13}\text{C}$  NMR (100 MHz,  $\text{DMSO}-d_6$ ):  $\delta$  150.6, 144.2, 135.5, 134.9, 129.5, 128.6, 123.2, 122.3, 119.4, 111.9. GC-MS:  $m/z = 228$ .

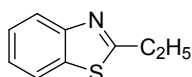

**2-ethylbenzo[d]thiazole (3u):** Eluent: petroleum ether/ethyl acetate (30:1). White solid: 25 mg (78%).  $^1\text{H}$  NMR (400 MHz,  $\text{DMSO}-d_6$ ):  $\delta$  7.53-7.58 (m, 2H), 7.18-7.25 (m, 2H), 2.80 (q,  $J = 7.6$  Hz, 2H), 1.36 (t,  $J = 7.6$  Hz, 3H);  $^{13}\text{C}$  NMR (100 MHz,  $\text{DMSO}-d_6$ ):  $\delta$  155.6, 138.6, 122.0, 114.6, 22.7, 12.5. HRMS (EI): calcd for  $\text{C}_9\text{H}_9\text{NS}$ : 163.0456; found: 163.0447.

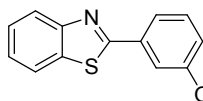

**2-(3-Methoxyphenyl)benzo[d]thiazole (3v):** Eluent: petroleum ether/ethyl acetate (80:1). White solid: 44 mg (93%). m.p.: 242-244 °C (lit.<sup>[7]</sup> 246-247 °C).  $^1\text{H}$  NMR (400 MHz,  $\text{DMSO}-d_6$ ):  $\delta$  7.50 (d,  $J = 7.6$  Hz, 2H), 7.18 (s, 4H),  $J = 7.6$  Hz, 2H), 2.29 (s, 3H);  $^{13}\text{C}$  NMR (100 MHz,  $\text{DMSO}-d_6$ ):  $\delta$  167.5, 160.2, 153.9, 134.9, 134.6, 130.9, 127.1, 125.9, 123.4, 122.7, 120.2, 117.8, 112.0. GC-MS:  $m/z = 241$ .

## 7. References

- (1) X. Liu, H. Fu, Y. Jiang, Y. Zhao, *Angew. Chem. Int. Ed.*, 2009, **48**, 348-351
- (2) W. Xu, H. Fu, *J. Org. Chem.*, 2011, **76**, 3846-3852
- (3) A. J. A. Watson, A. C. Maxwell, J. M. Williams, *Org. Biomol. Chem.*, 2012, **10**, 240-243
- (4) X. S. Wang, K. Yang, J. Zhou, S. J. Tu, *J. Comb. Chem.*, 2010, **12**, 417-421.
- (5) W. Xu, H. Fu, *J. Org. Chem.*, 2011, **76**, 3846-3852
- (6) H. Hidemasa, Y. Ino, H. Suzuki, Y. Yokoyama, *J. Org. Chem.*, 2012, **77**, 7046-7051
- (7) T. B. Nguyen, L. Ermolenko, W. A. Dean, A. Al-Mourabit, *Org. Lett.*, 2012, **14**, 5948-5951
- (8) J. Zhou, J. Fang, *J. Org. Chem.*, 2011, **76**, 7730-7736

## 8. Copies of $^1\text{H}$ and $^{13}\text{C}$ NMR spectra

### $^1\text{H}$ and $^{13}\text{C}$ NMR spectra of 2-methylquinazolin-4(3H)-one (3a)

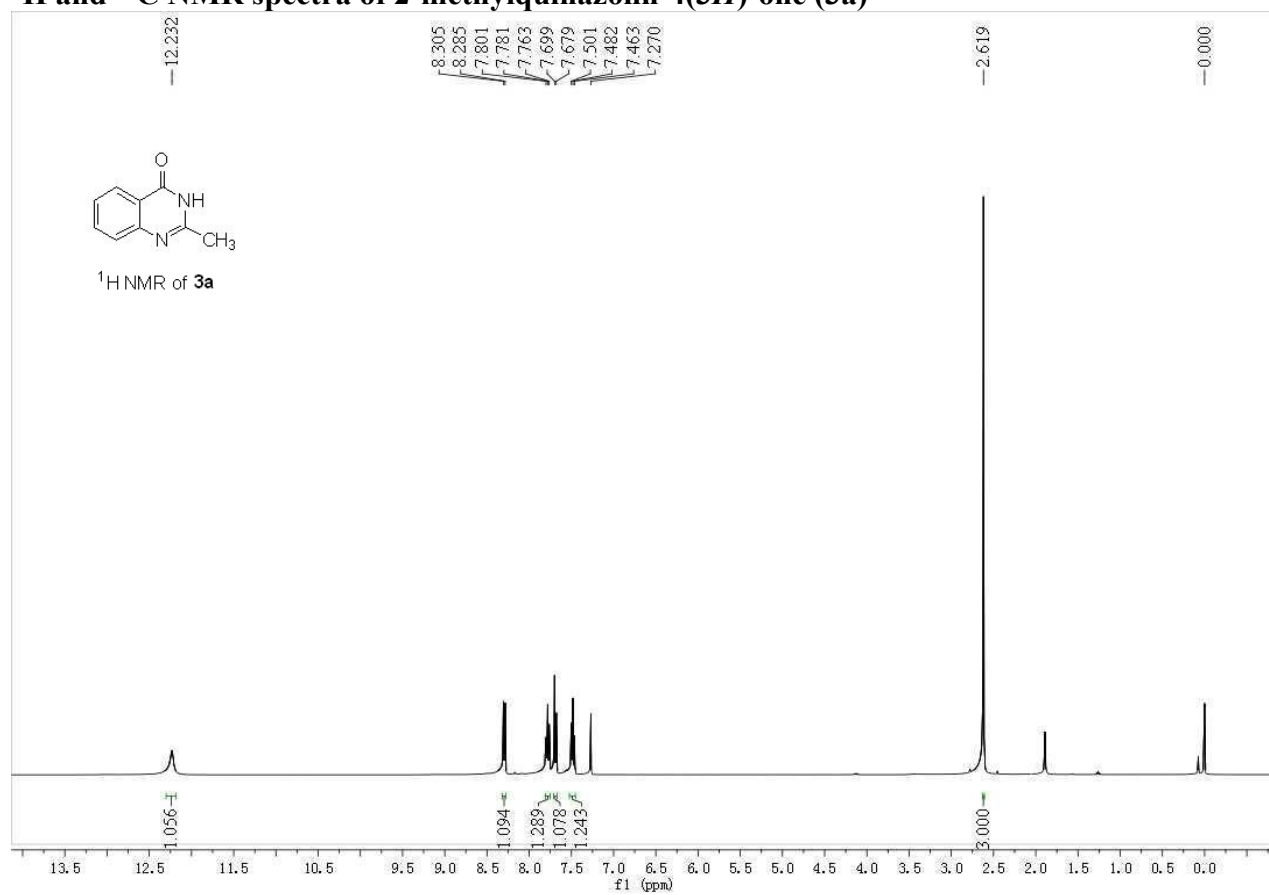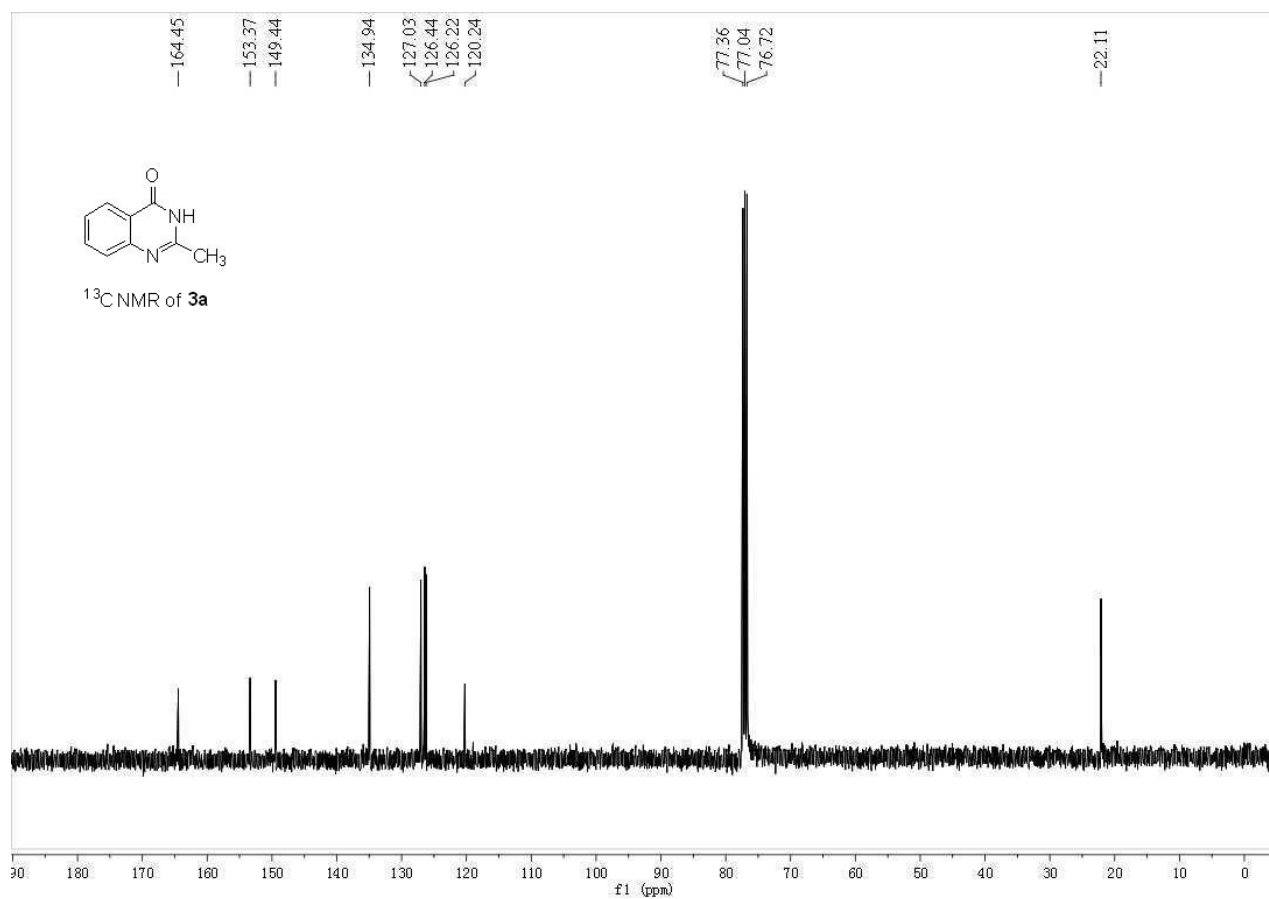

# <sup>1</sup>H and <sup>13</sup>C NMR spectra of 2-ethylquinazolin-4(3H)-one (3b)

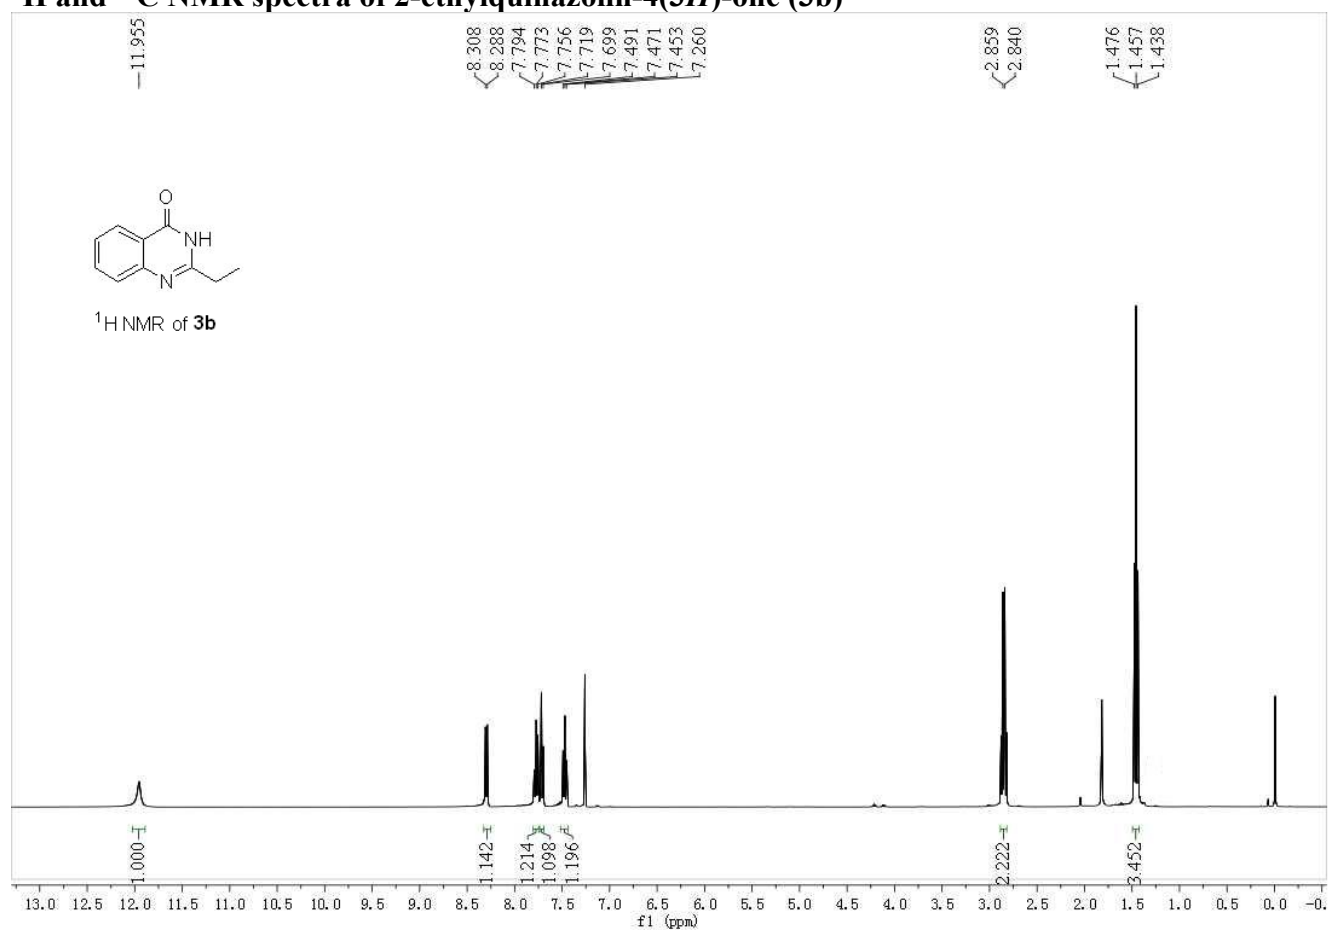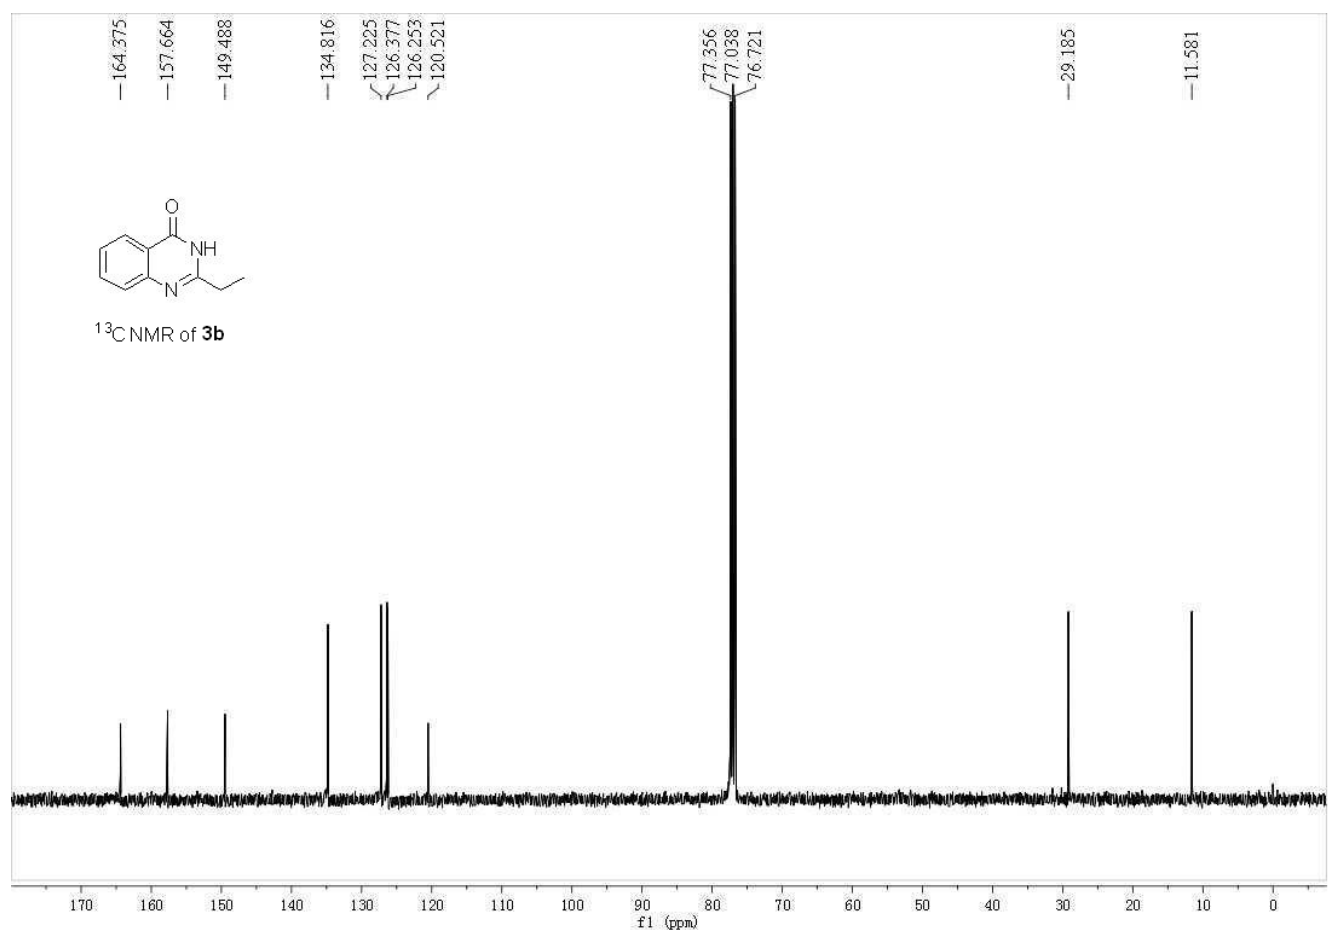

# <sup>1</sup>H and <sup>13</sup>C NMR spectra of 2-propylquinazolin-4(3H)-one (3c)

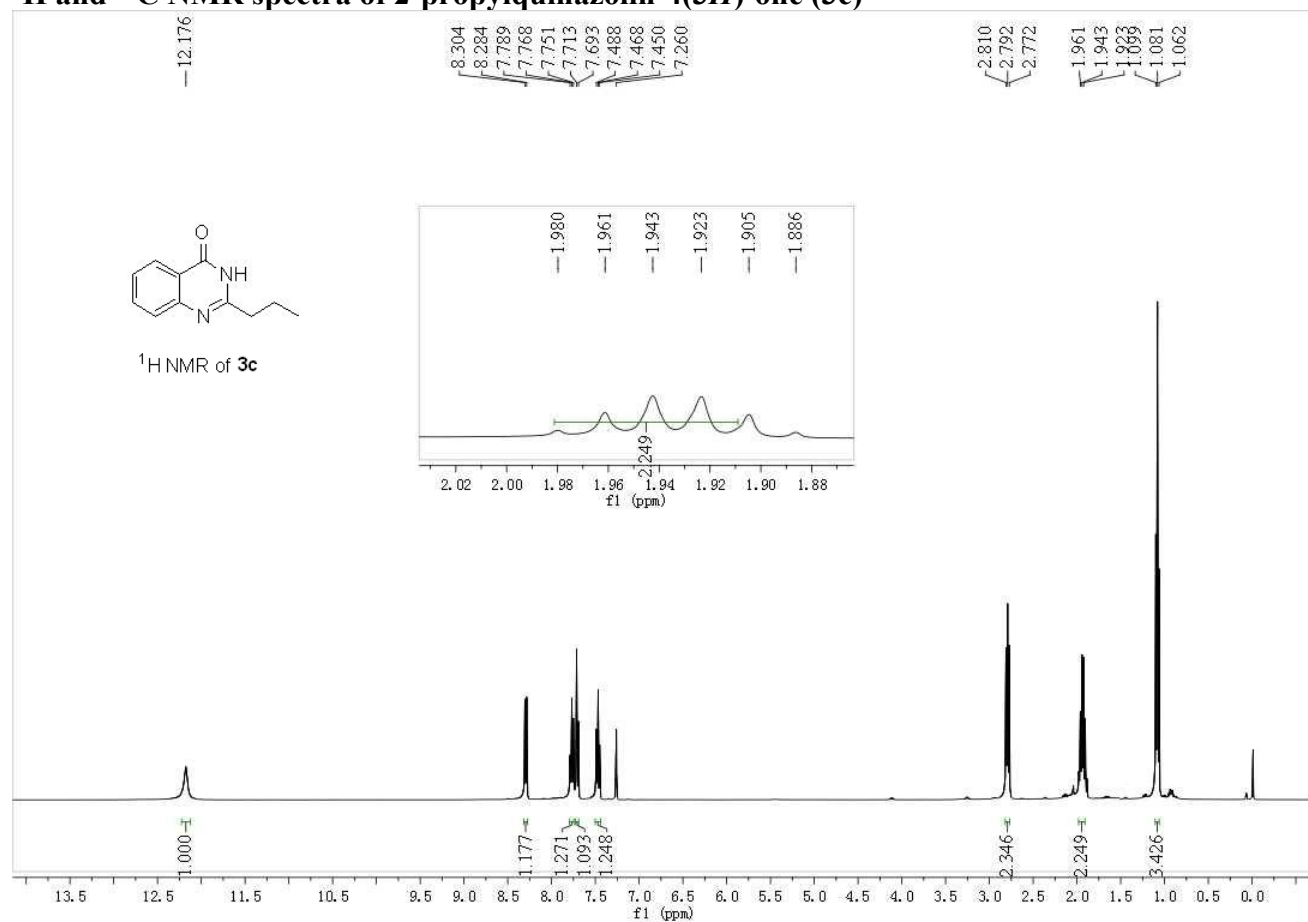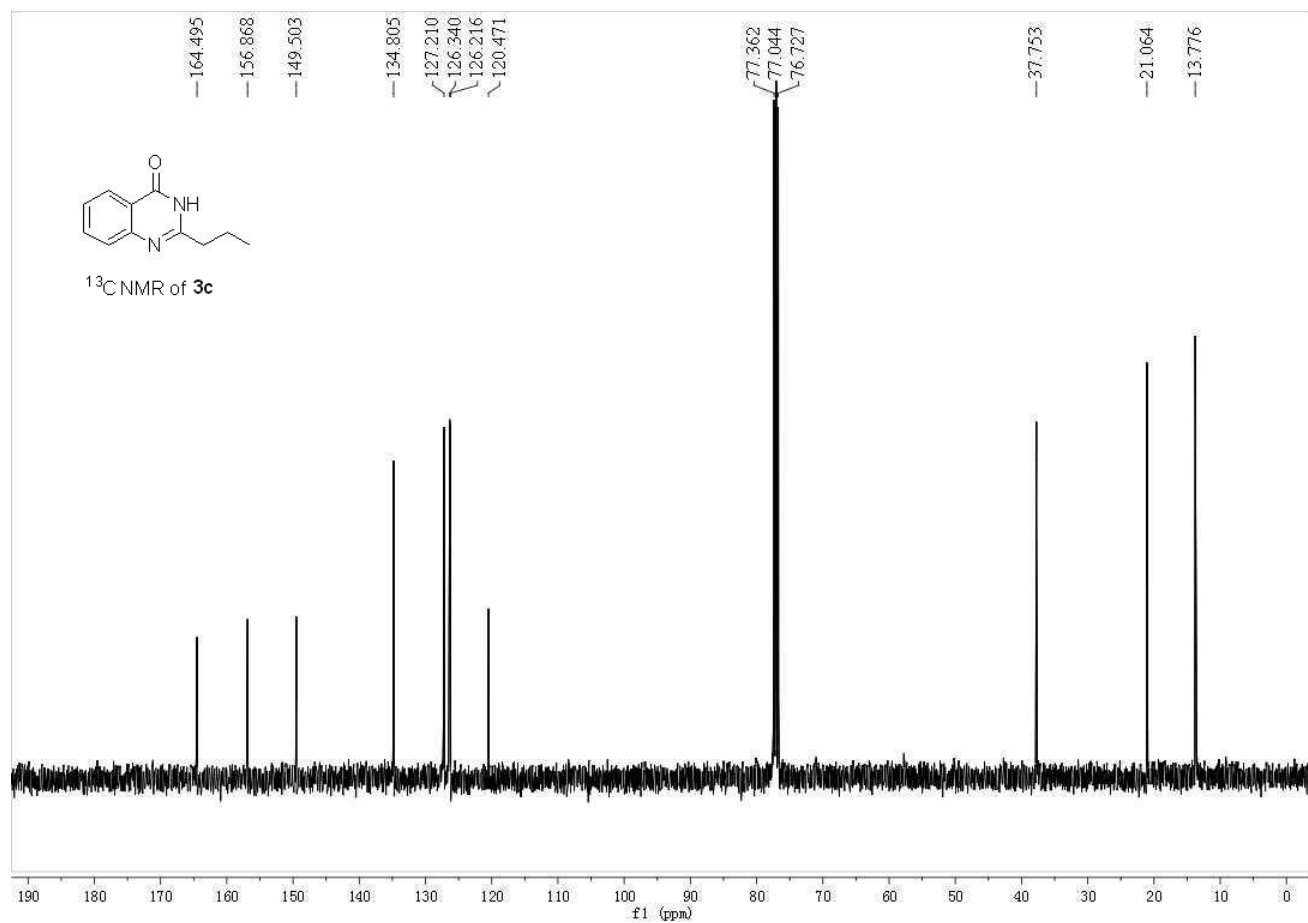

# <sup>1</sup>H and <sup>13</sup>C NMR spectra of 2-heptylquinazolin-4(3H)-one (3d)

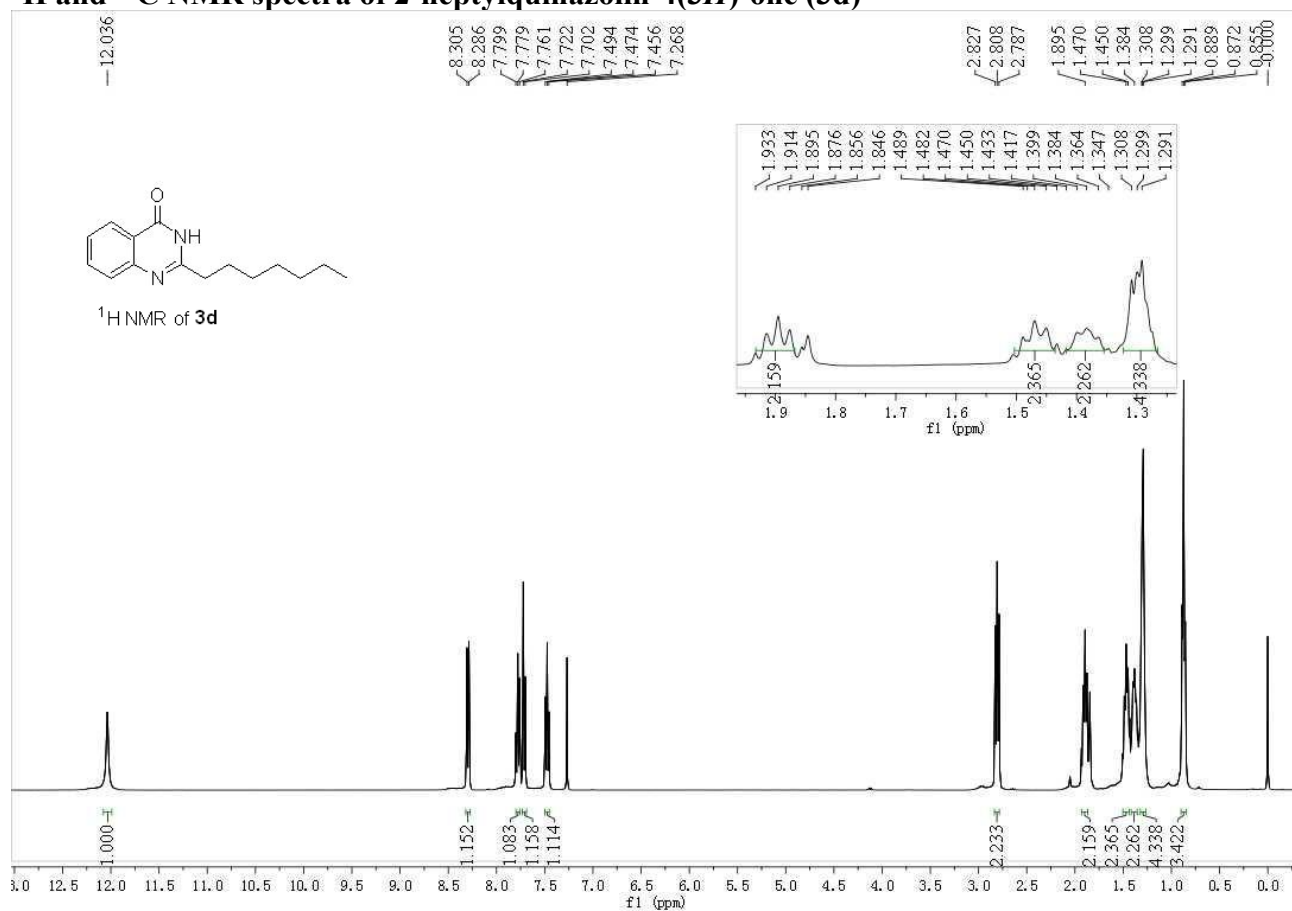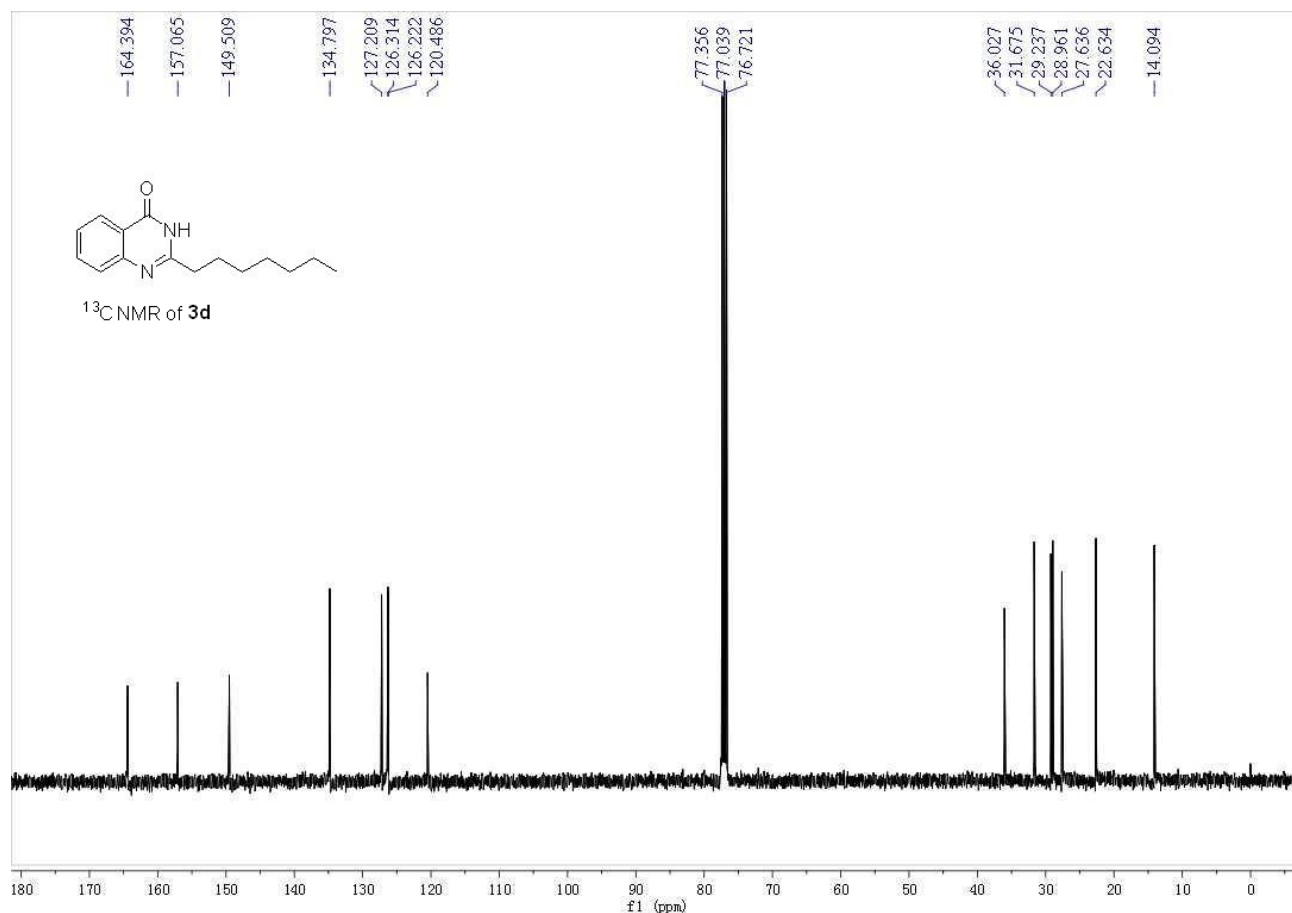



# <sup>1</sup>H and <sup>13</sup>C NMR spectra of 2-phenylquinazolin-4(3H)-one (3e)

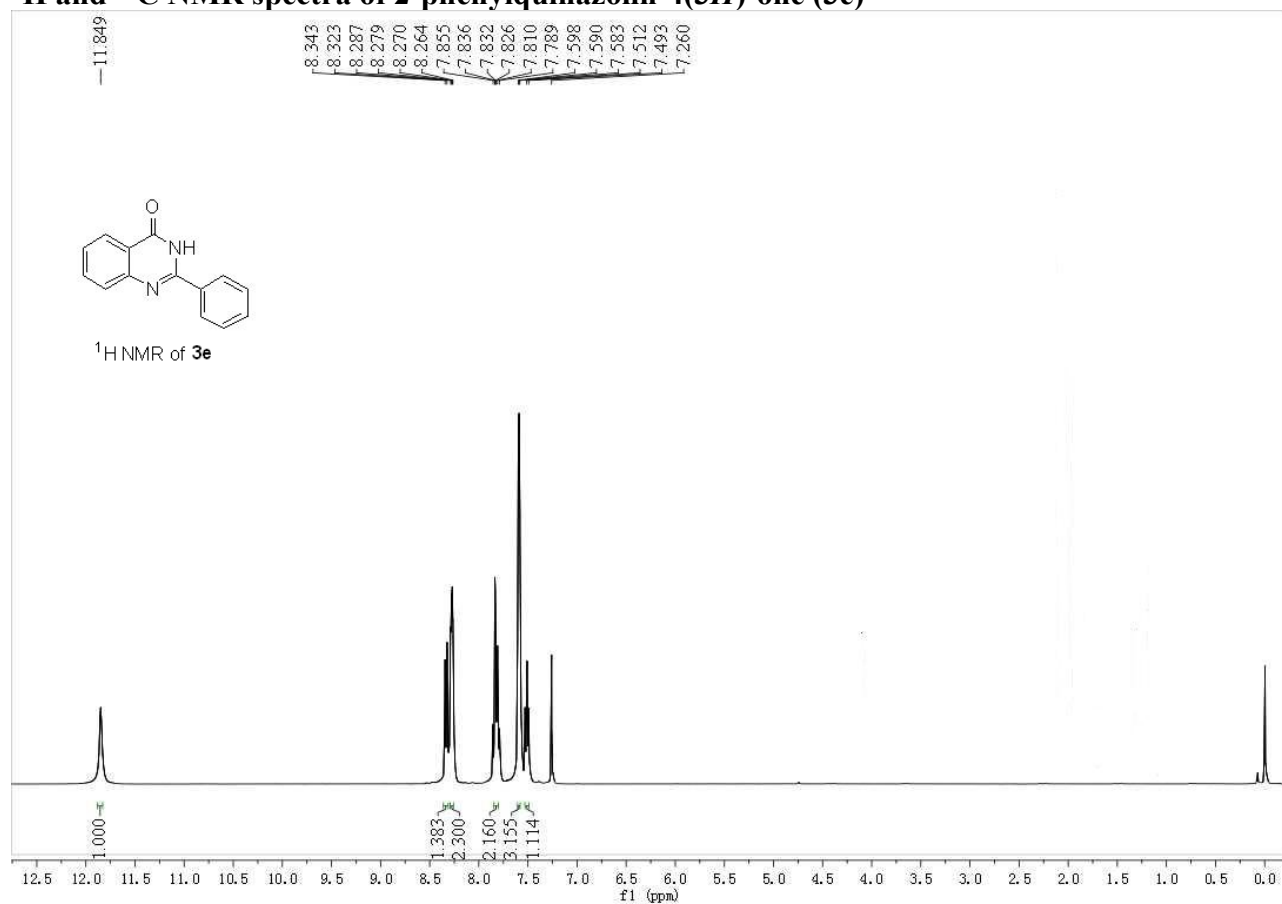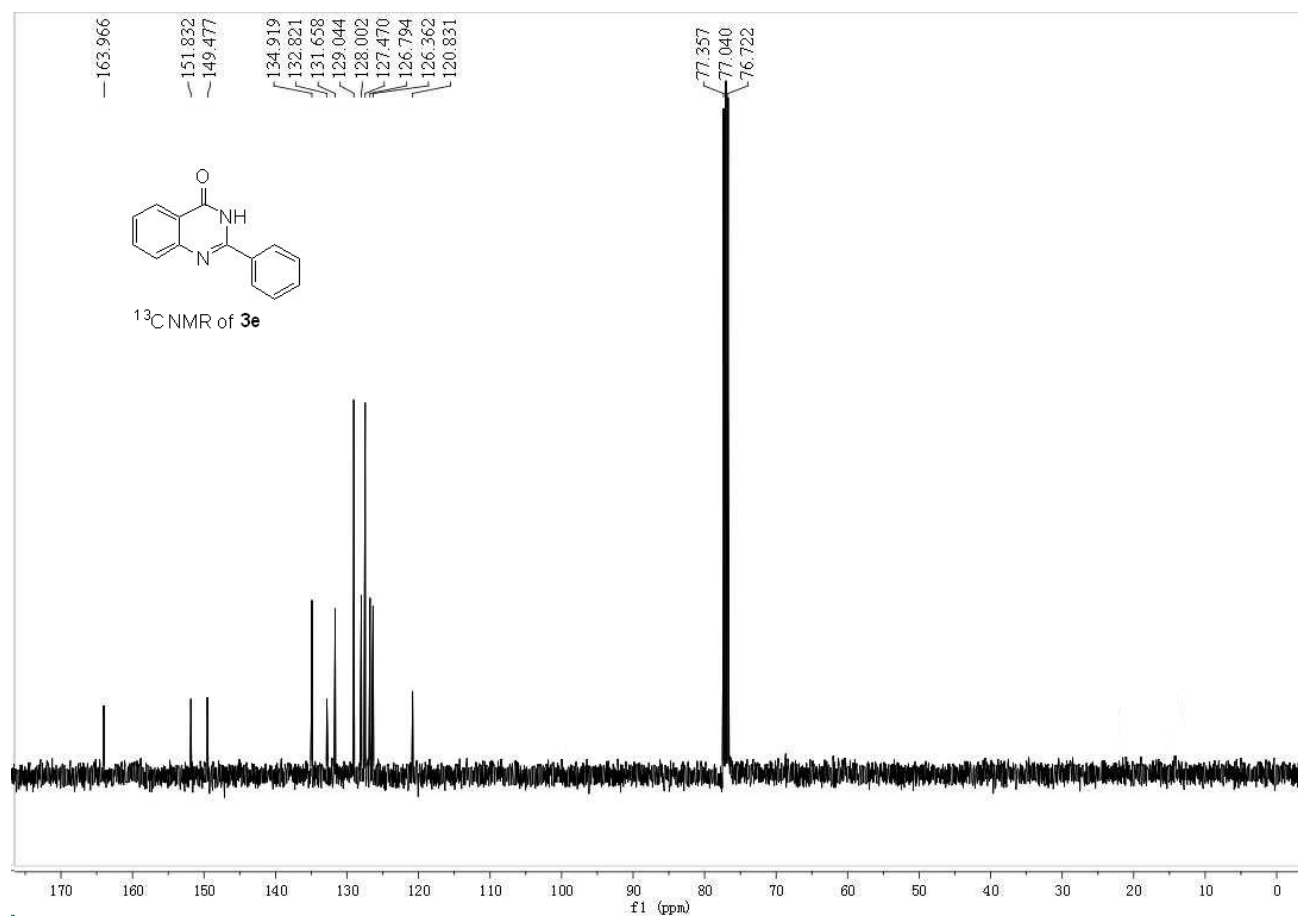

# <sup>1</sup>H and <sup>13</sup>C NMR spectra of 2,2-dimethyl-2,3-dihydroquinazolin-4(1H)-one (3f)

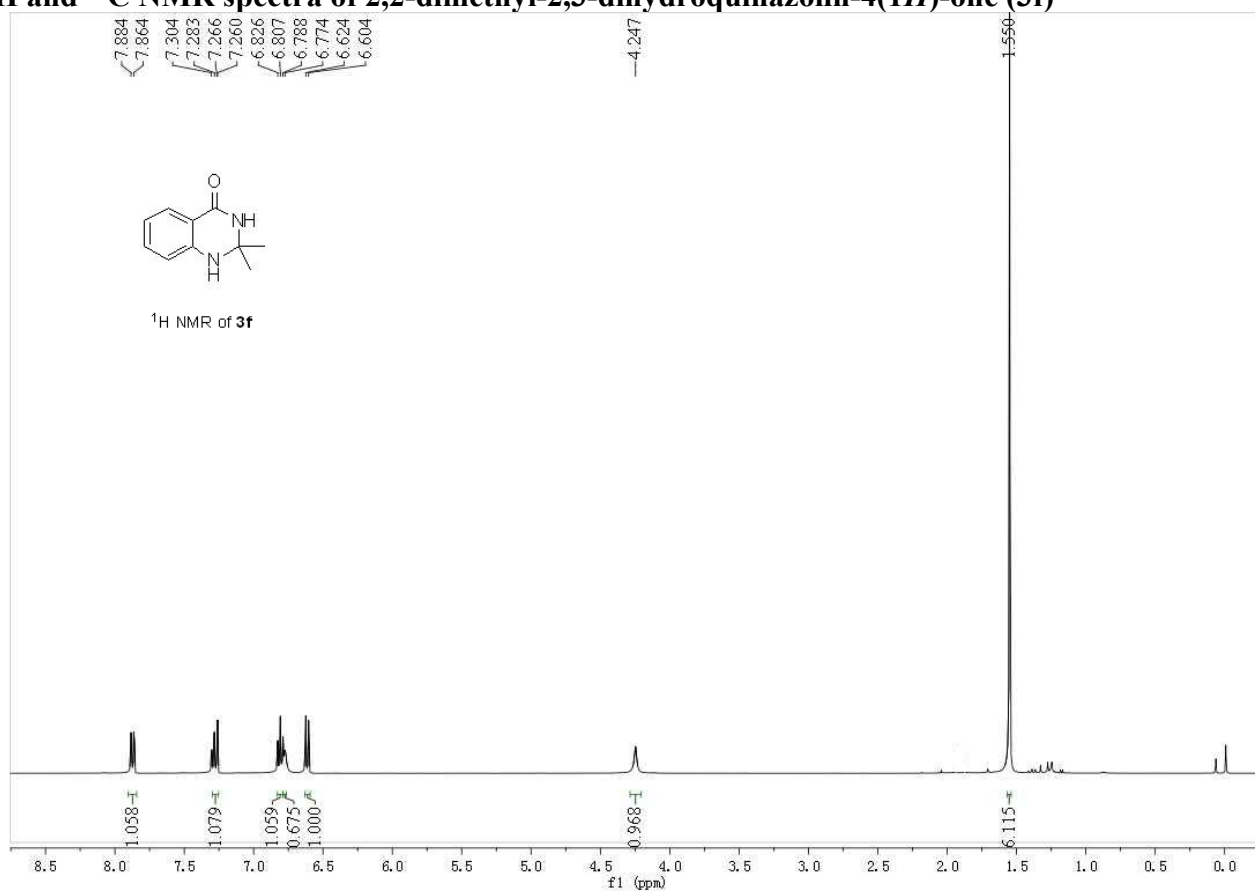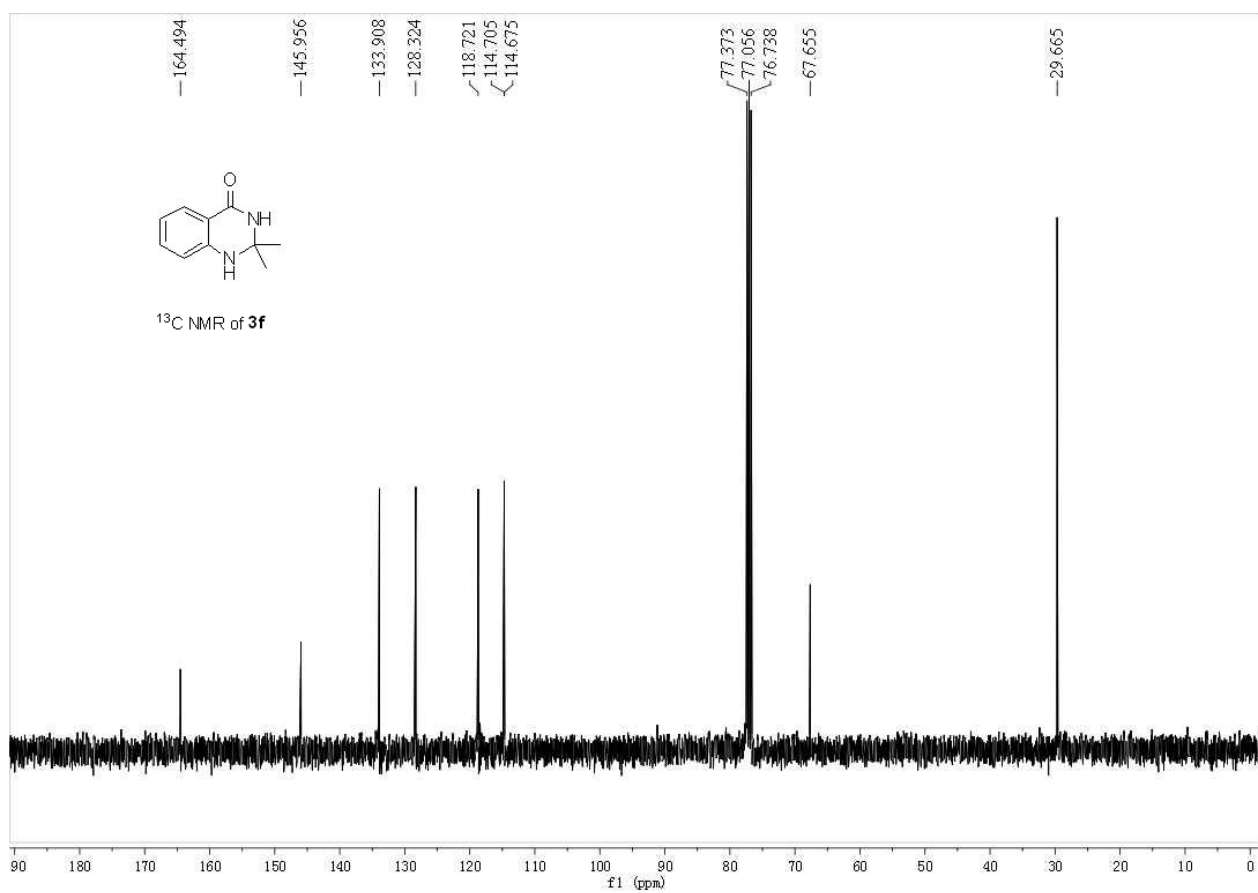

# <sup>1</sup>H and <sup>13</sup>C NMR spectra of quinazolin-4(3H)-one (3g)

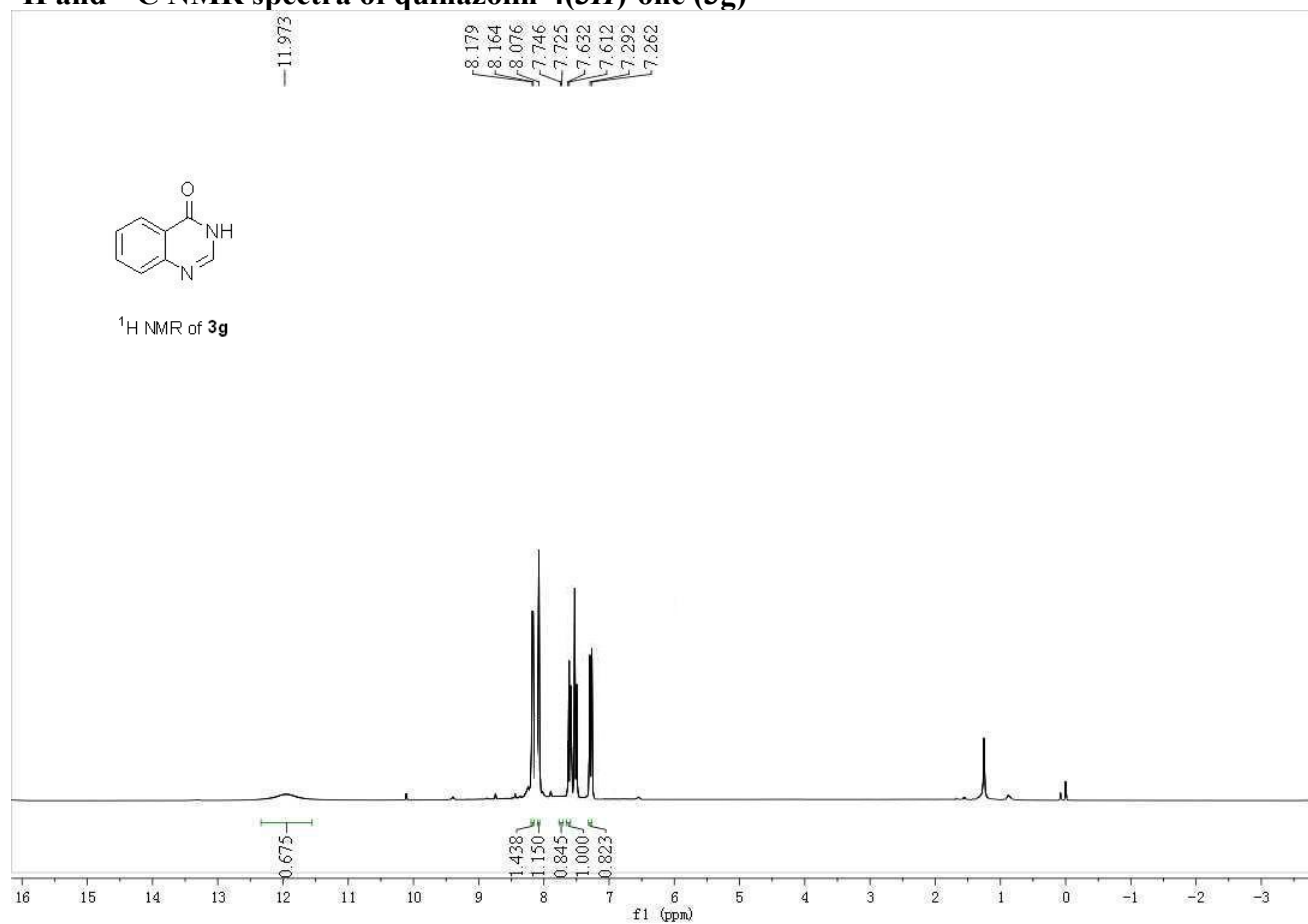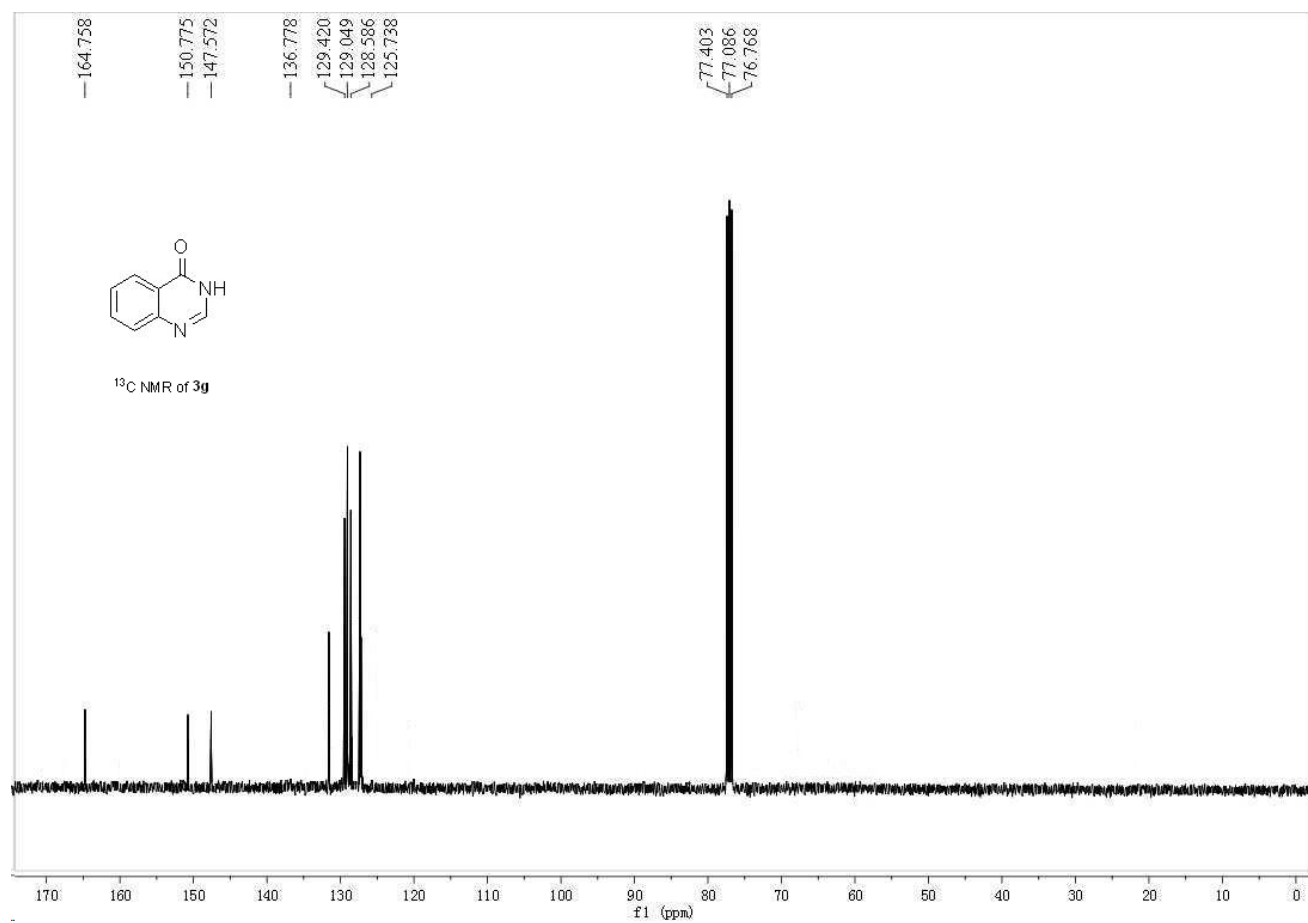

# <sup>1</sup>H and <sup>13</sup>C NMR spectra of 2,3-dimethylquinazolin-4(3H)-one (3h)

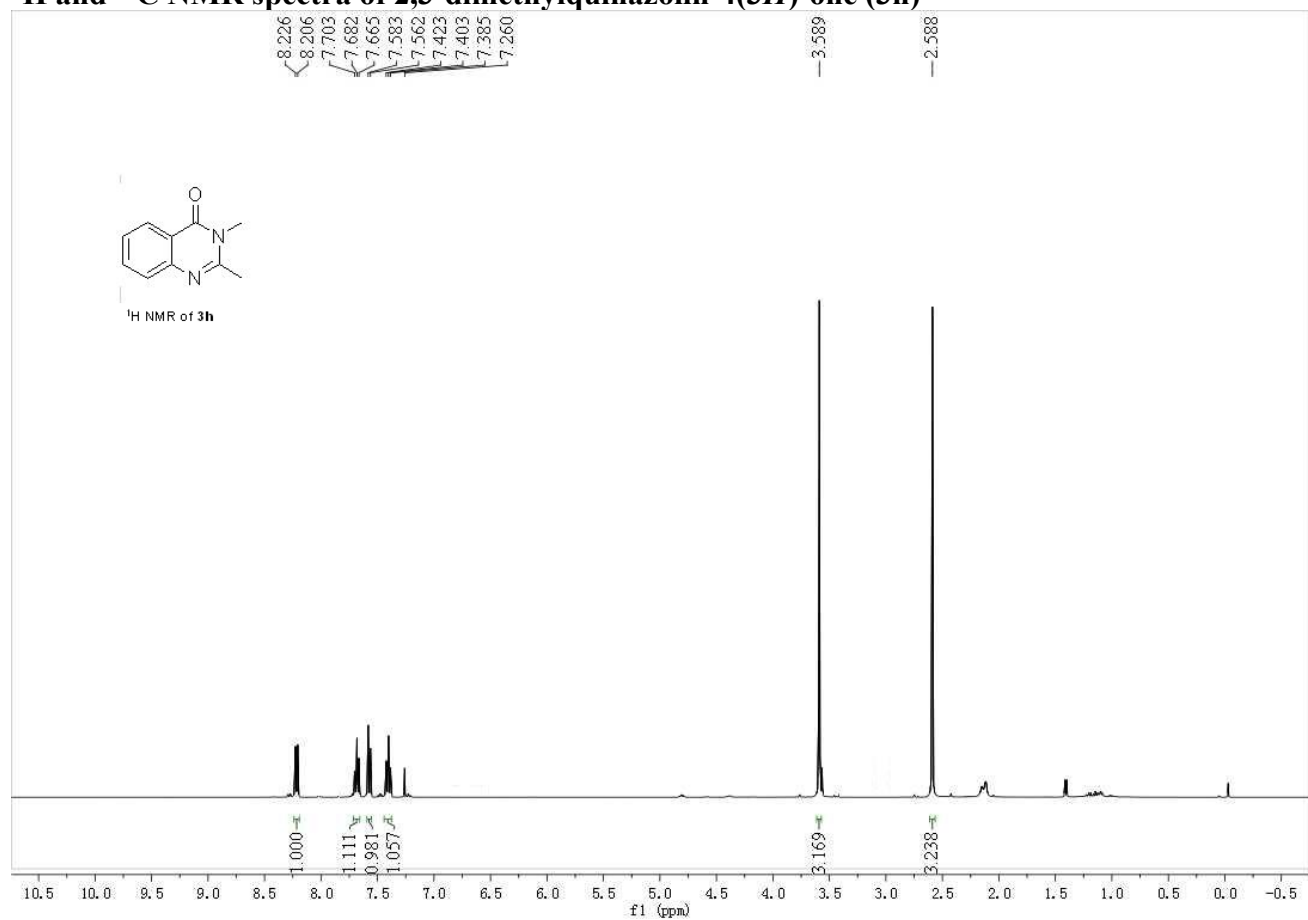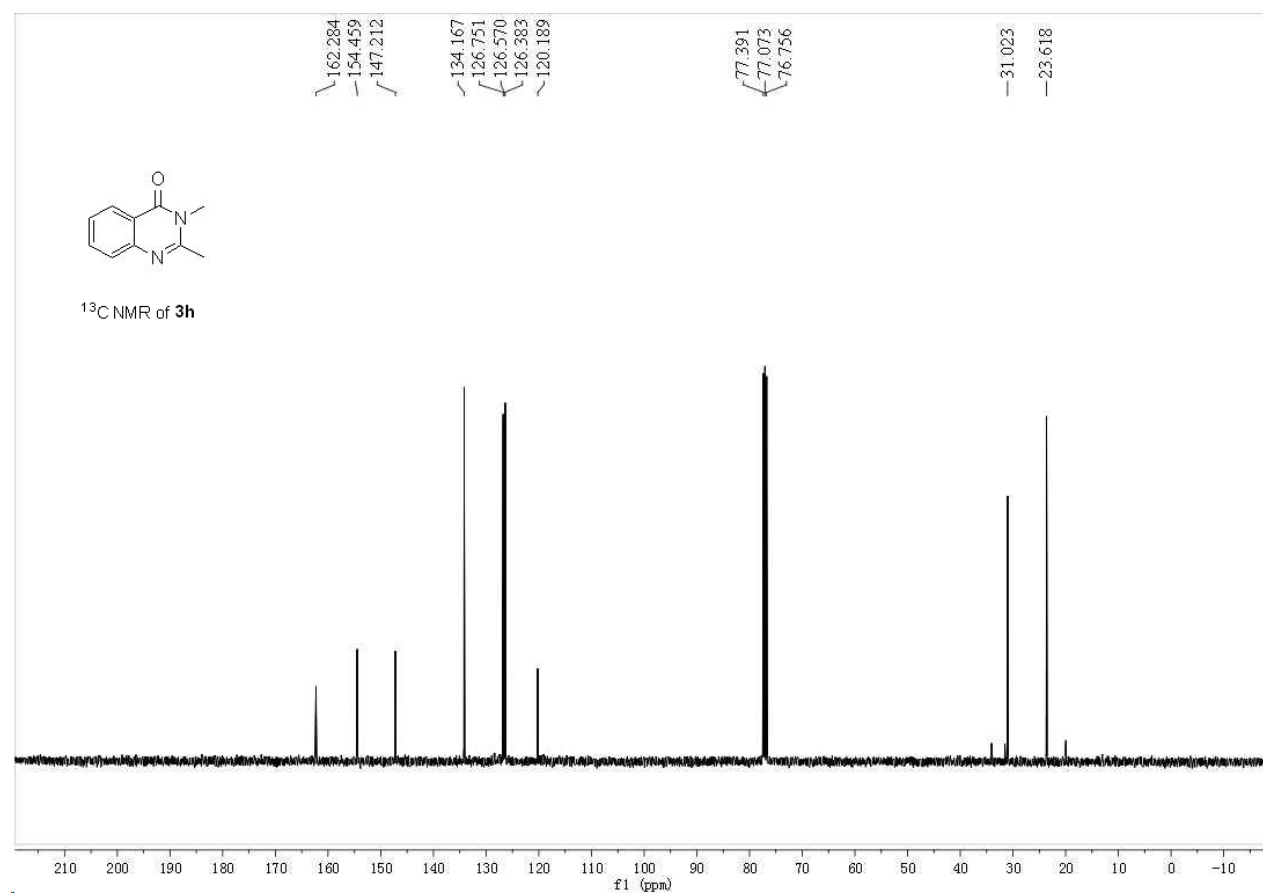

# <sup>1</sup>H and <sup>13</sup>C NMR spectra of 3-methyl-2-phenylquinazolin-4(3H)-one (3i)

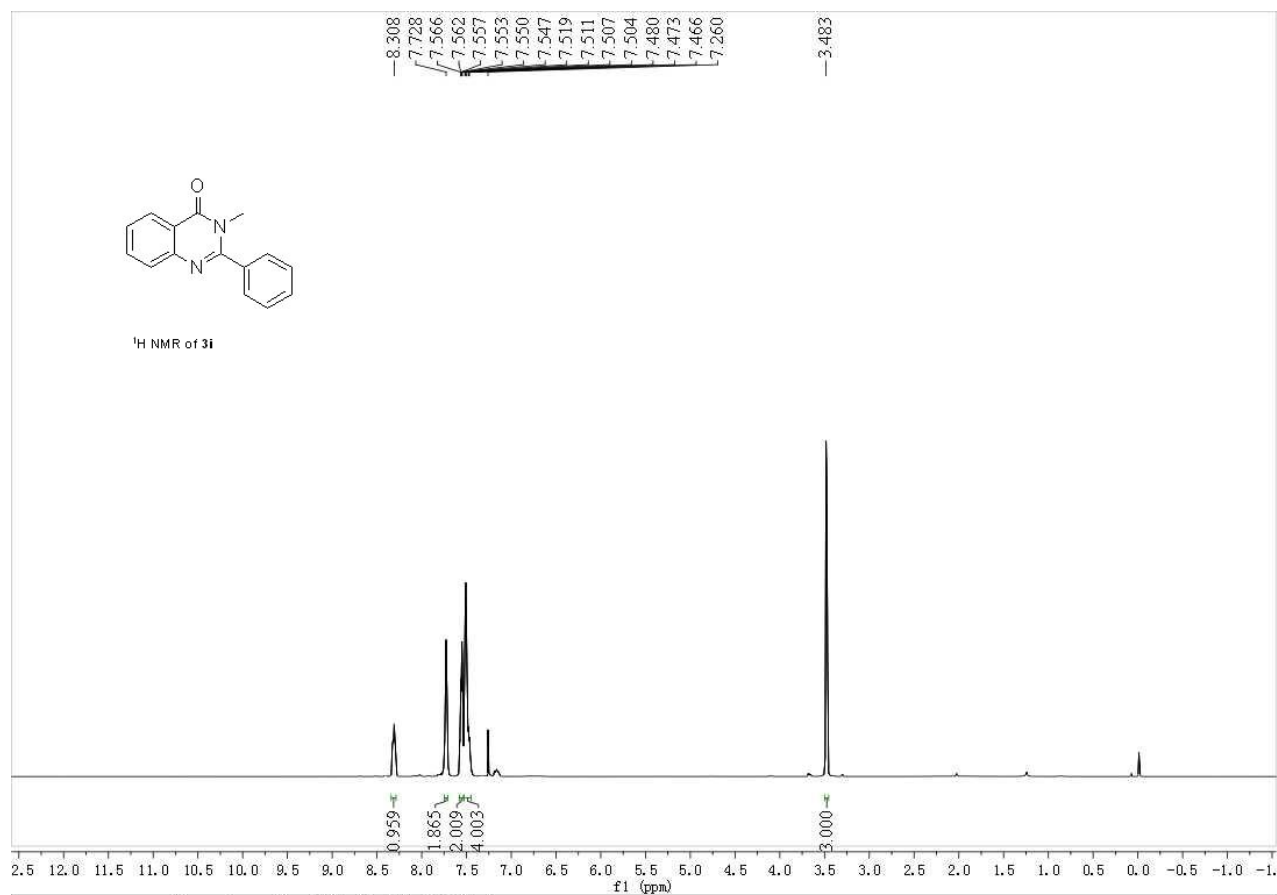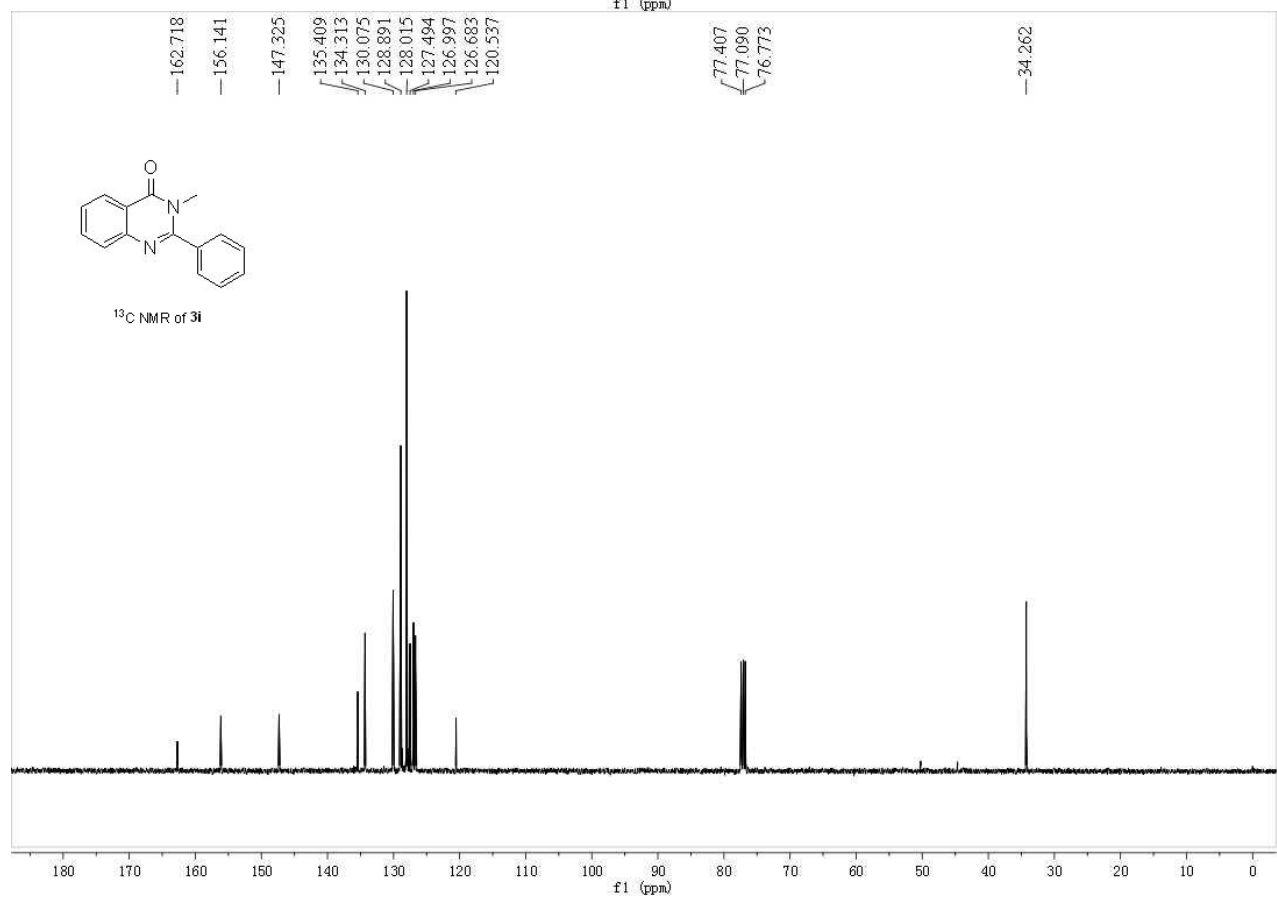

# <sup>1</sup>H and <sup>13</sup>C NMR spectra of 2-ethyl-6-methylquinazolin-4(3H)-one (3j)

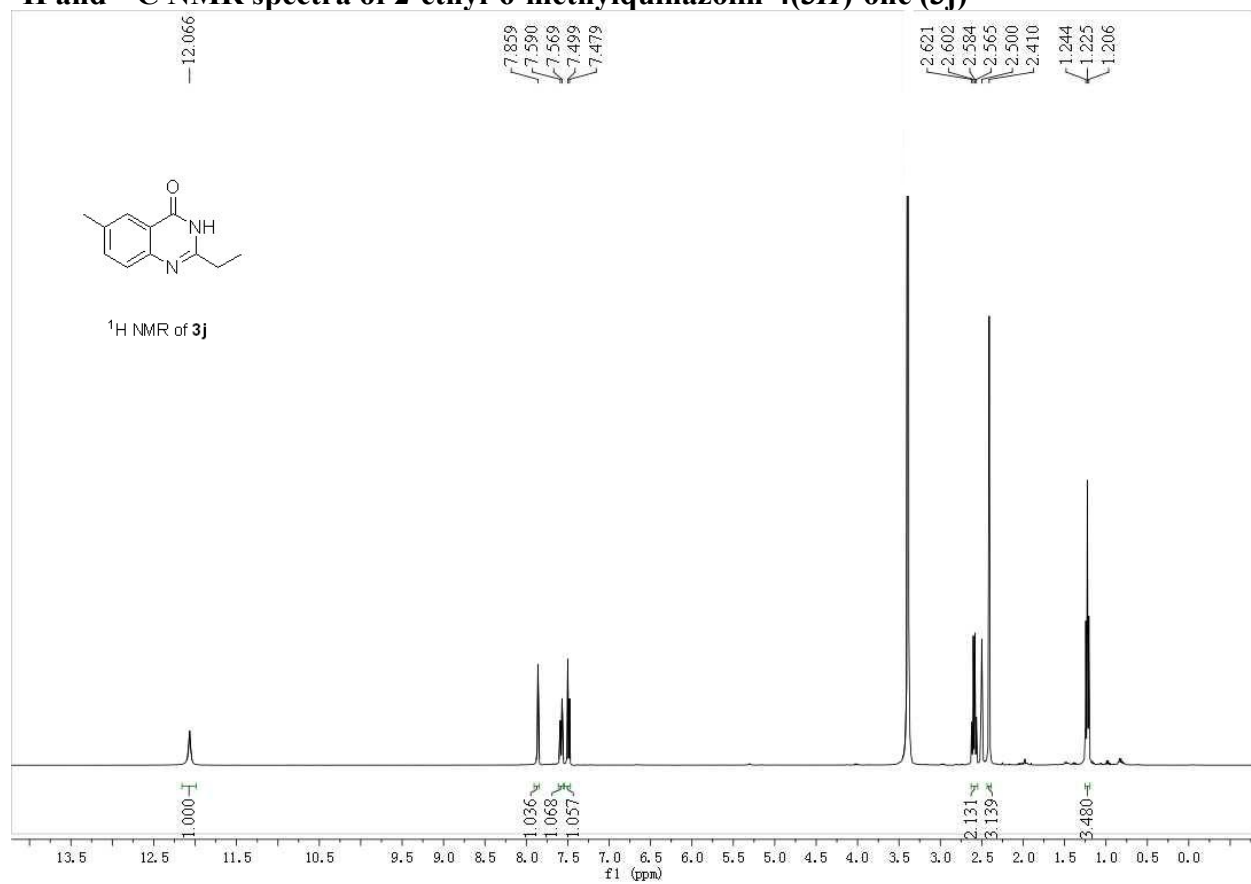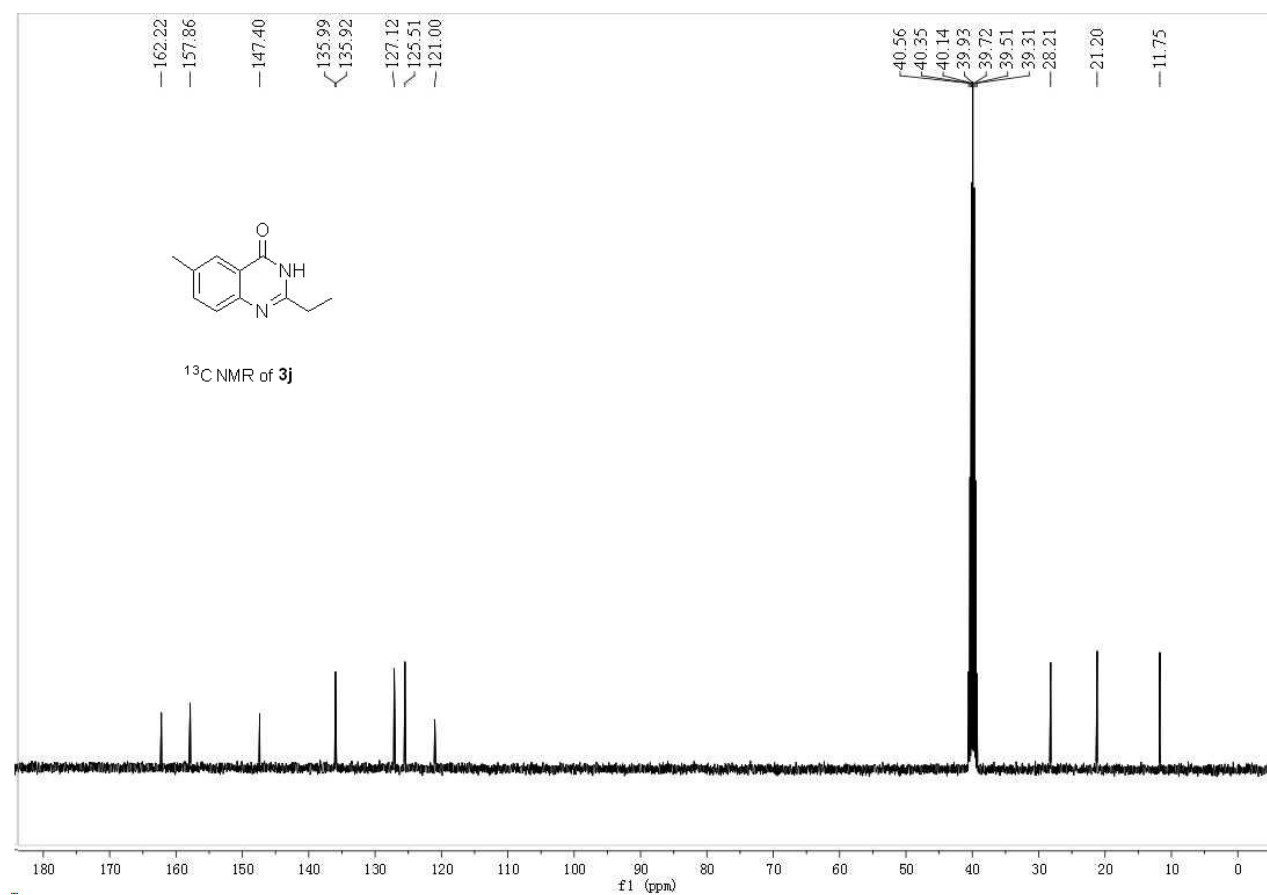

# <sup>1</sup>H and <sup>13</sup>C NMR spectra of 6-methyl-2-propylquinazolin-4(3H)-one (3k)

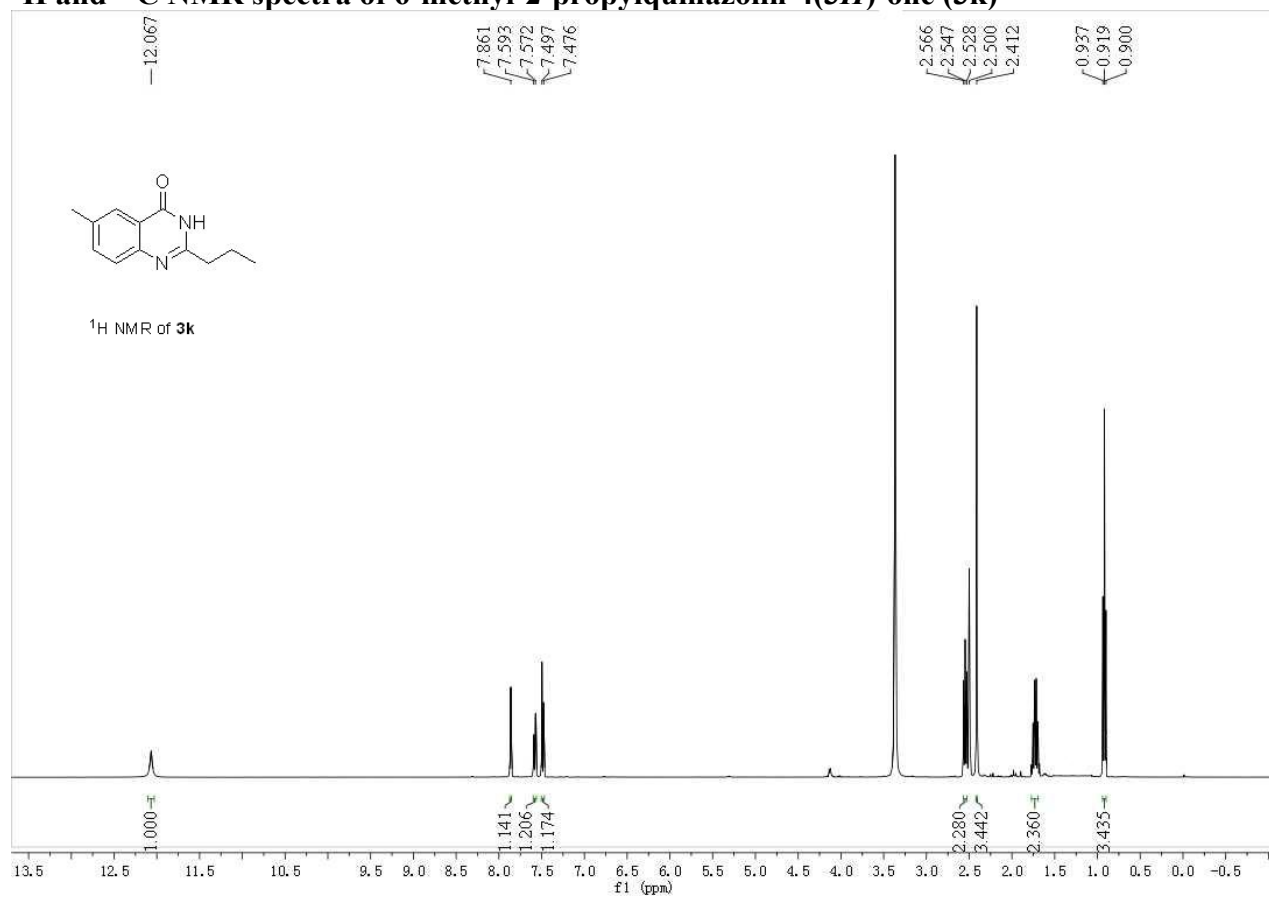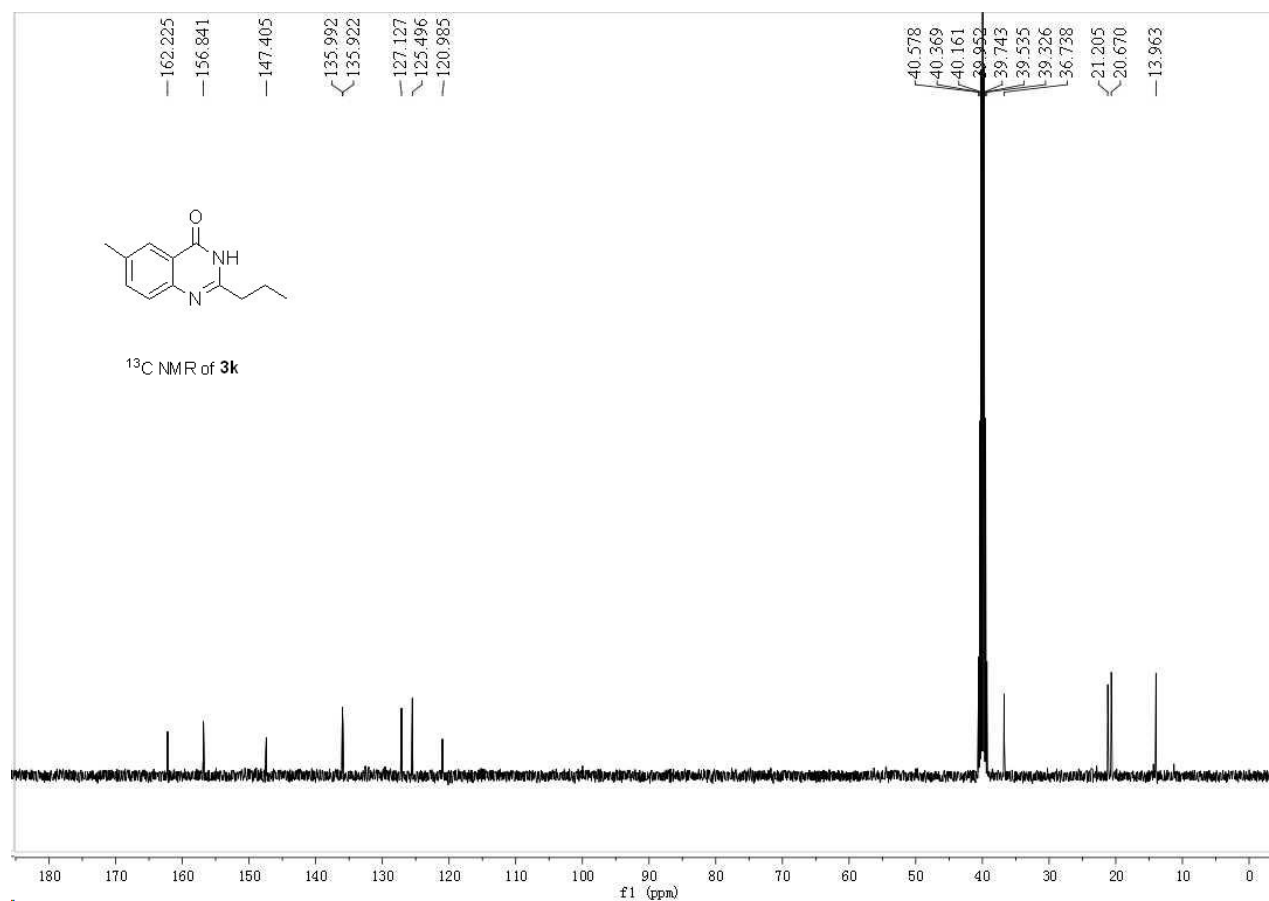

# <sup>1</sup>H and <sup>13</sup>C NMR spectra of 6-chloro-2-ethylquinazolin-4(3H)-one (3I)

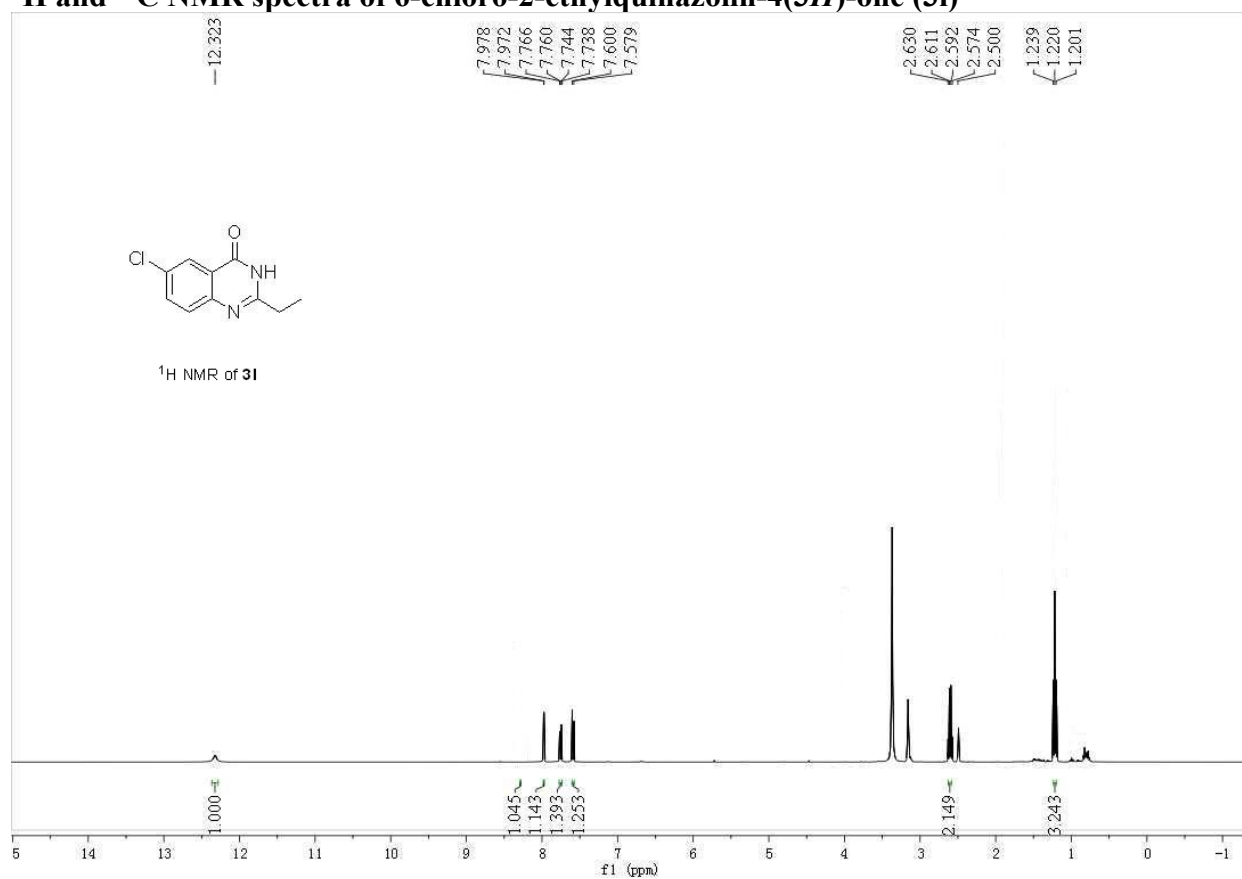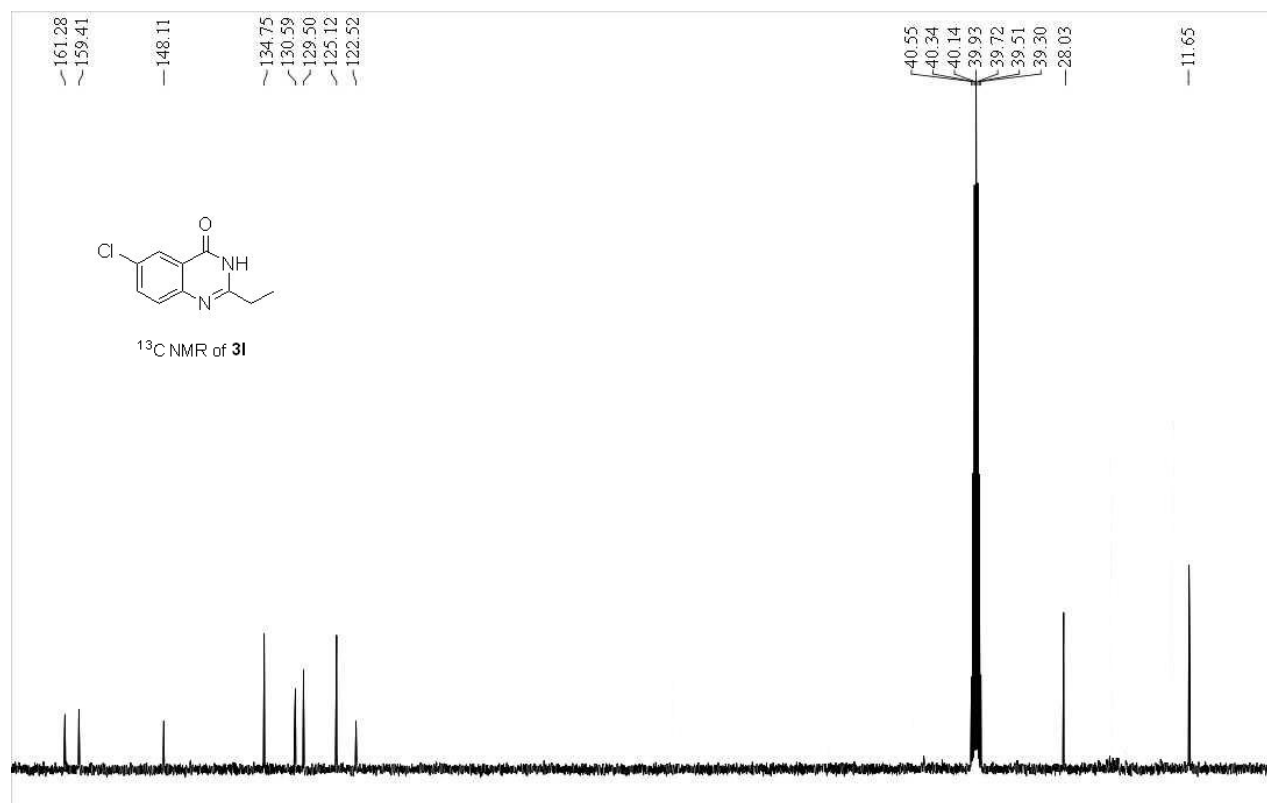



# <sup>1</sup>H and <sup>13</sup>C NMR spectra of 6-chloro-2-propylquinazolin-4(3H)-one (3m)

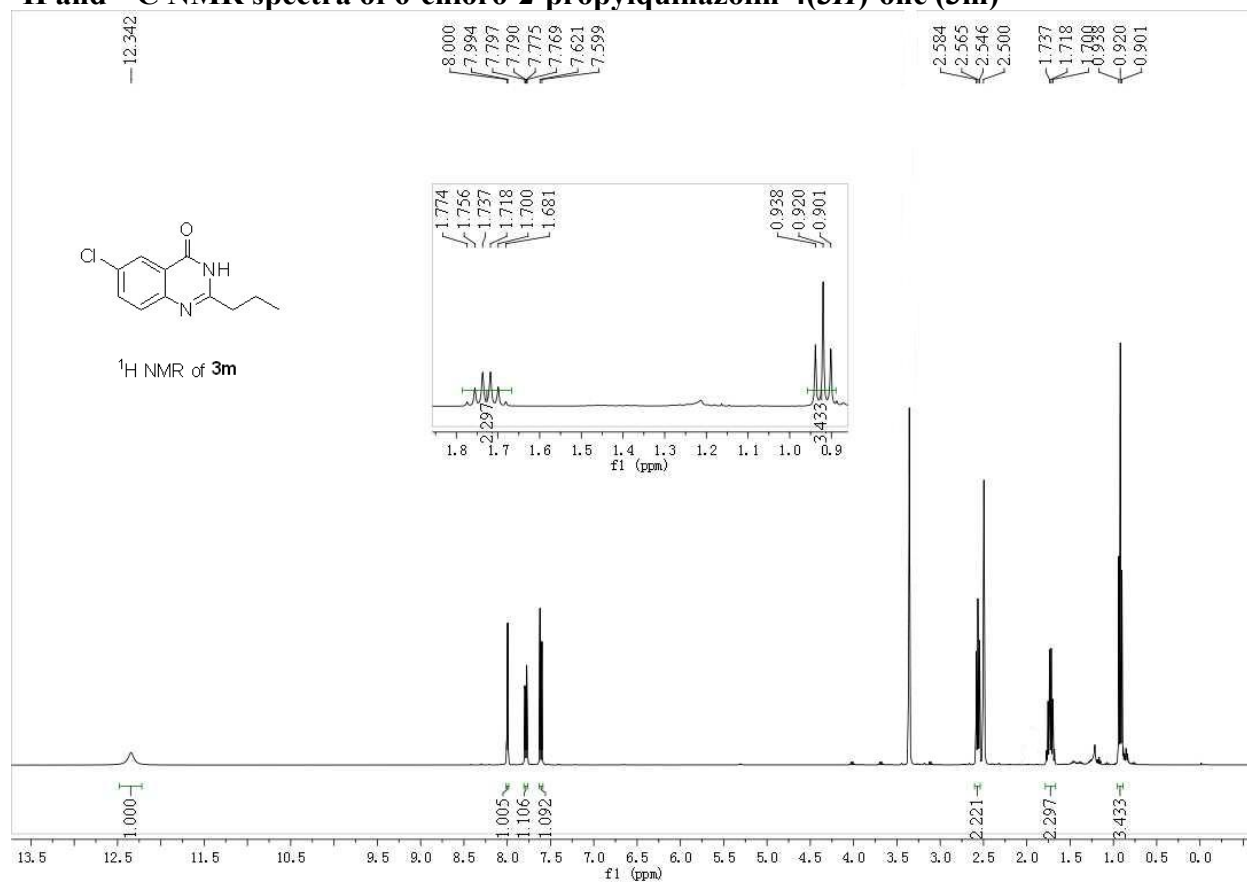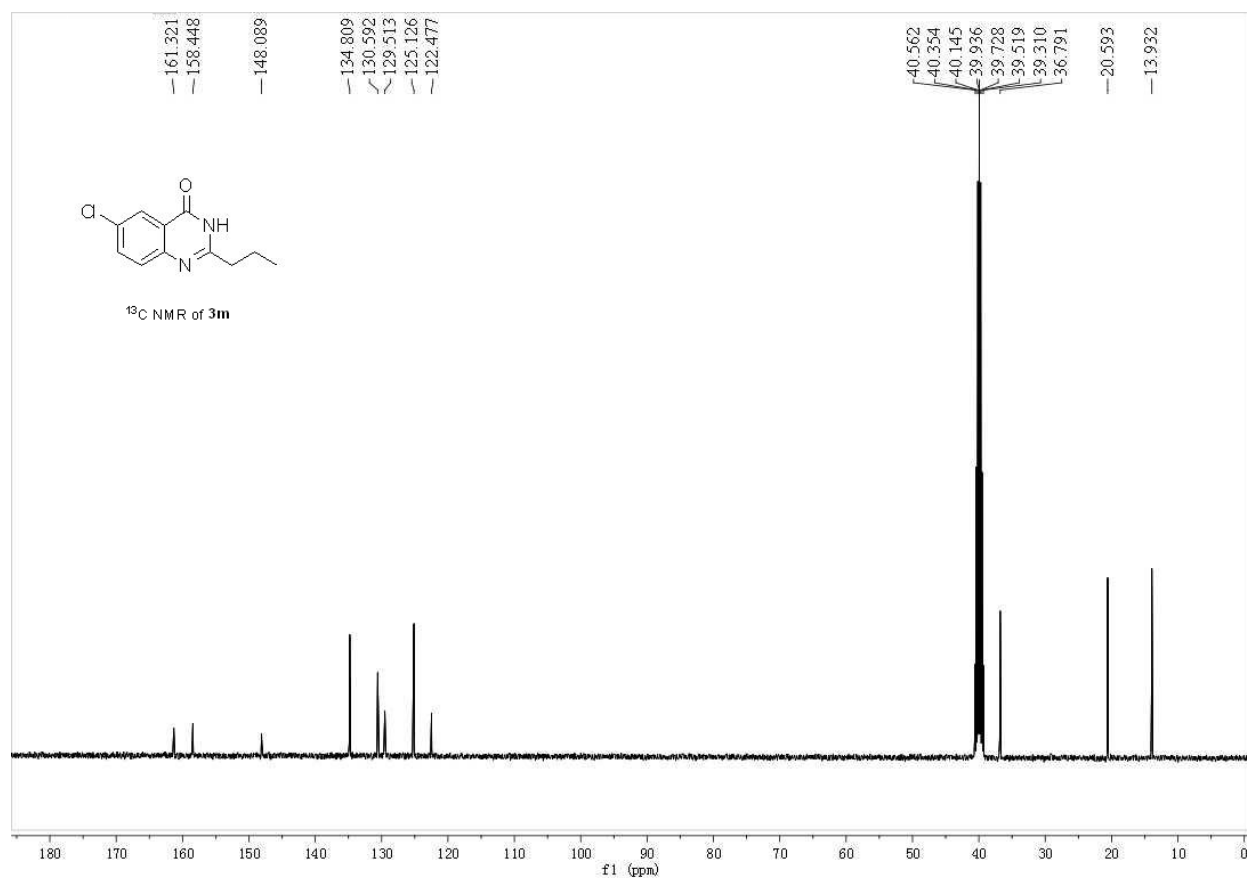

# <sup>1</sup>H and <sup>13</sup>C NMR spectra of 2-ethyl-1H-benzo[d]imidazole (3n)

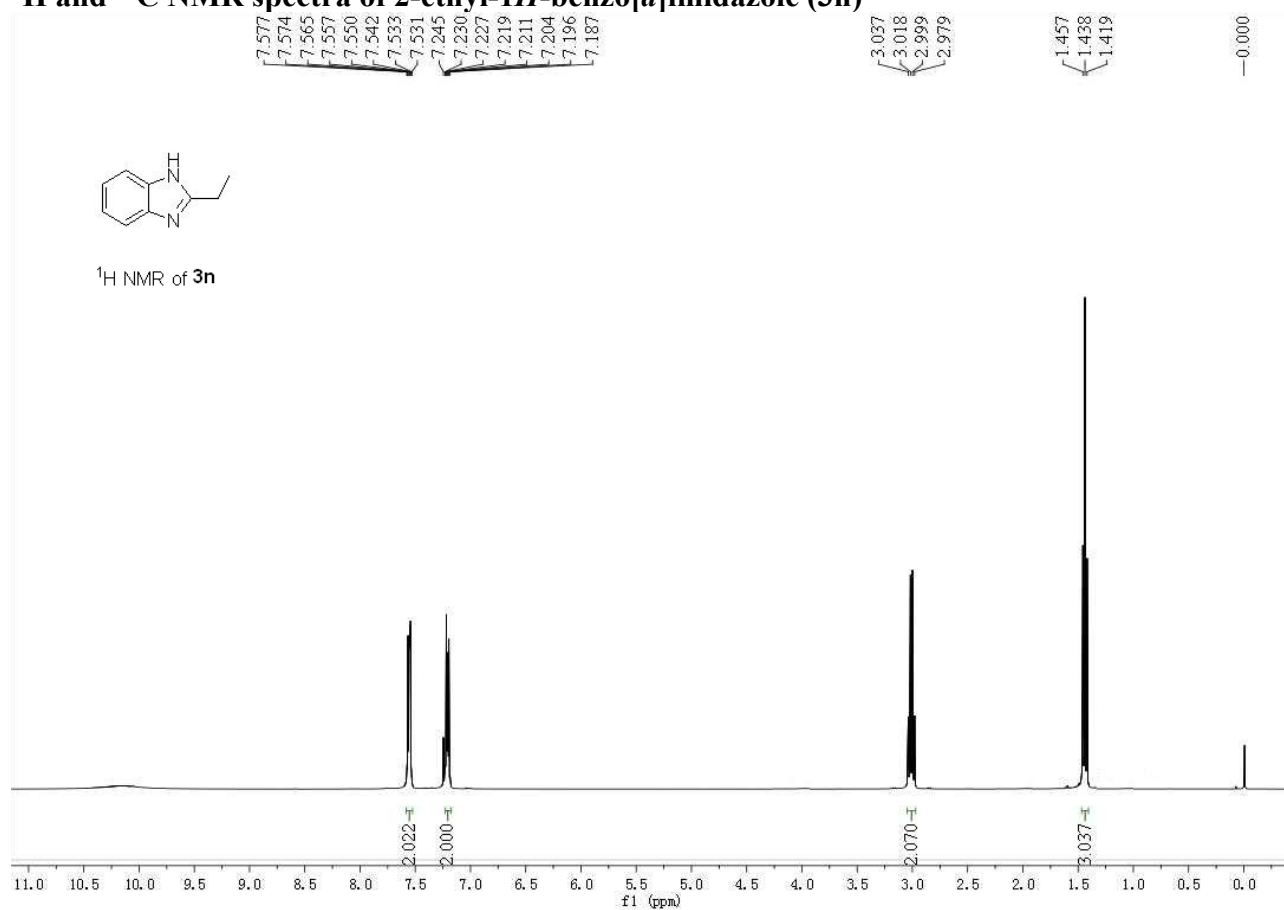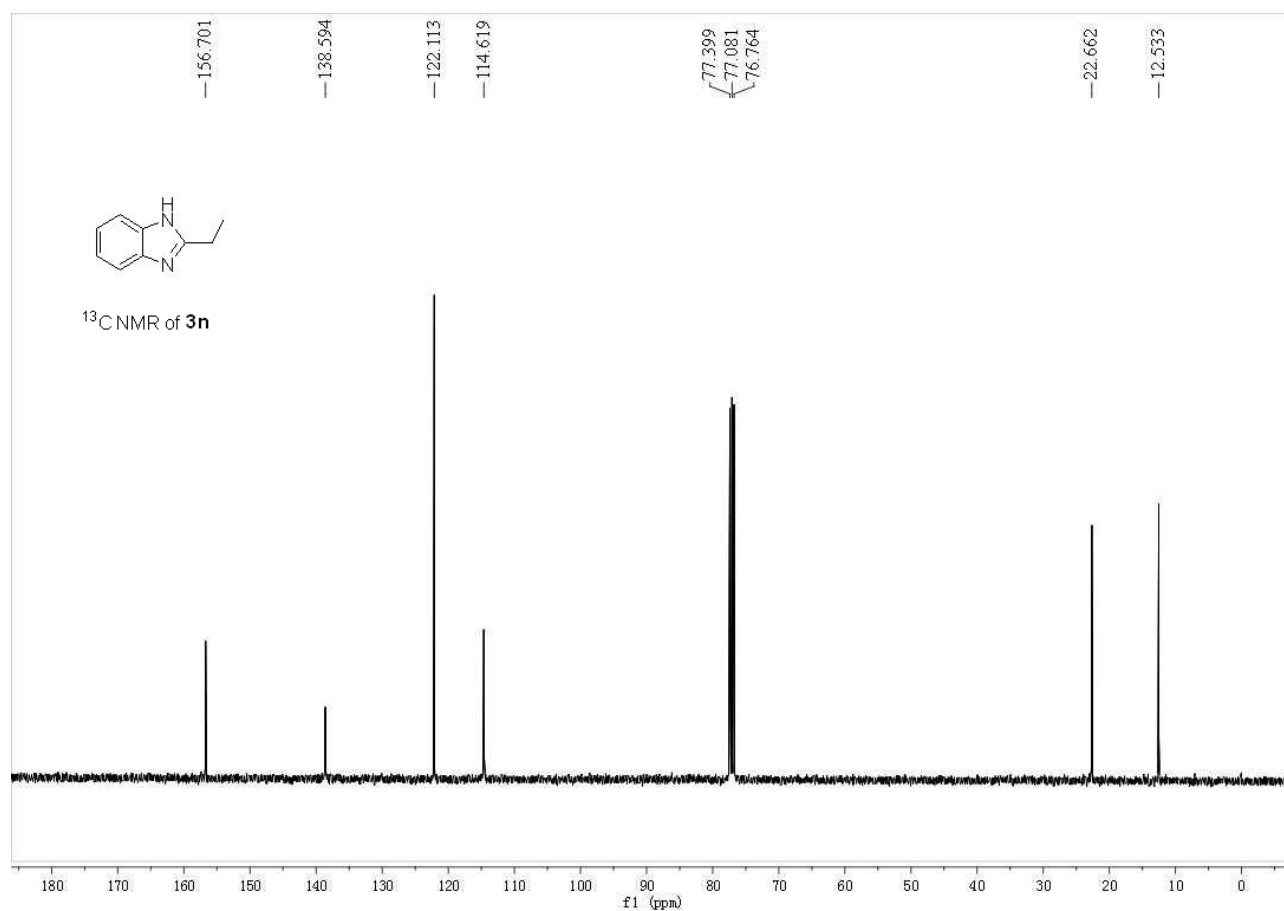

# <sup>1</sup>H and <sup>13</sup>C NMR spectra of 2-heptyl-1H-benzo[d]imidazole (3o)

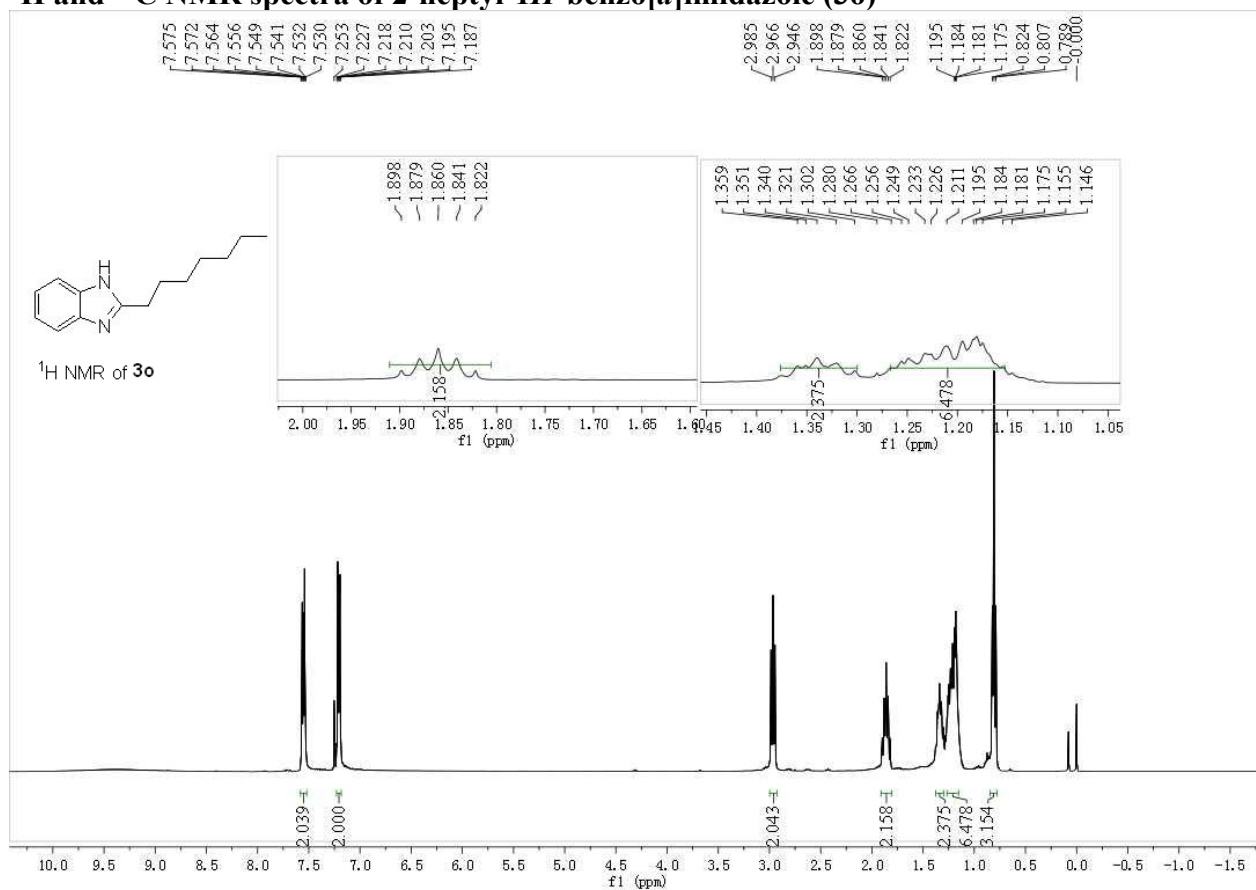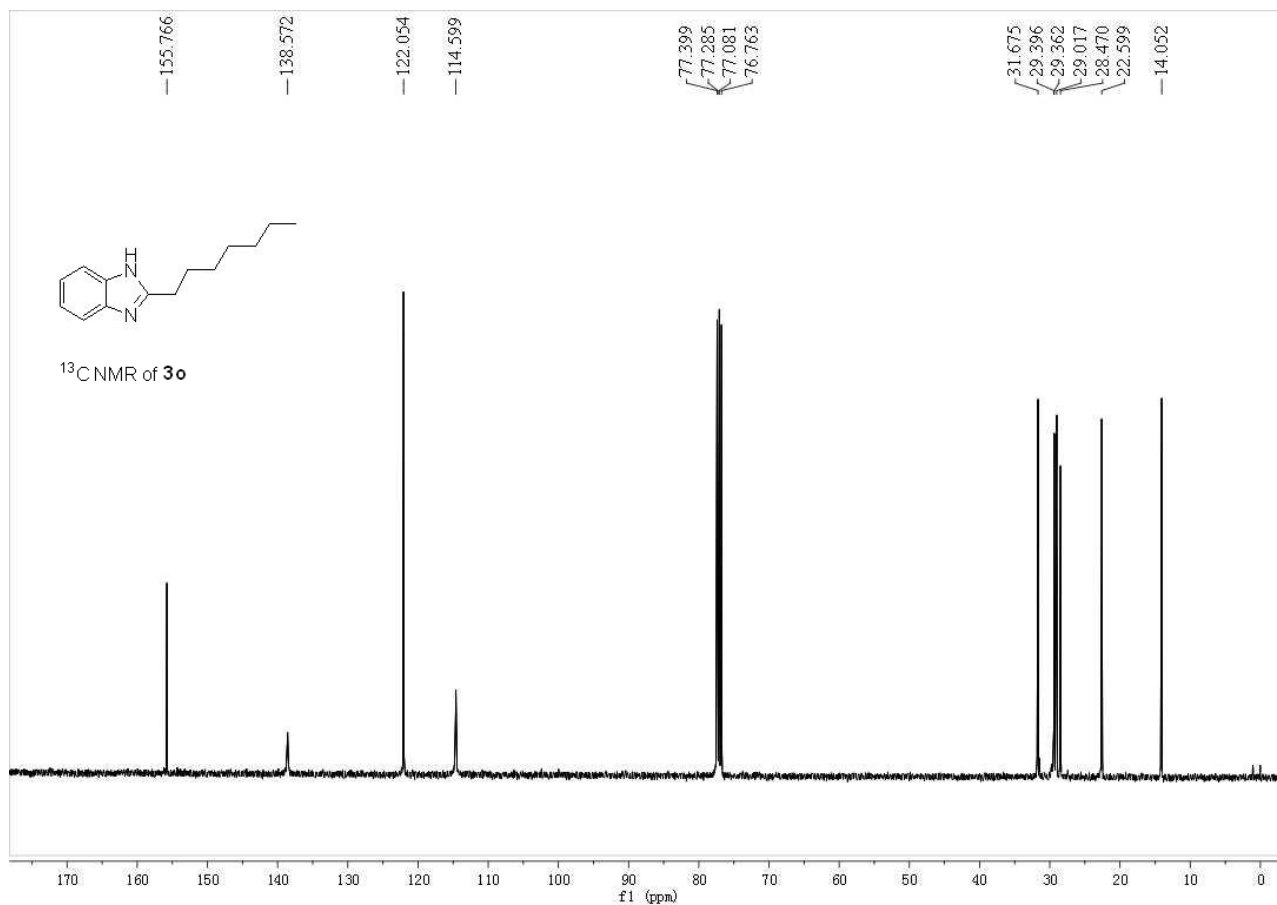

# <sup>1</sup>H and <sup>13</sup>C NMR spectra of 2-heptylbenzo[d]thiazole (3p)

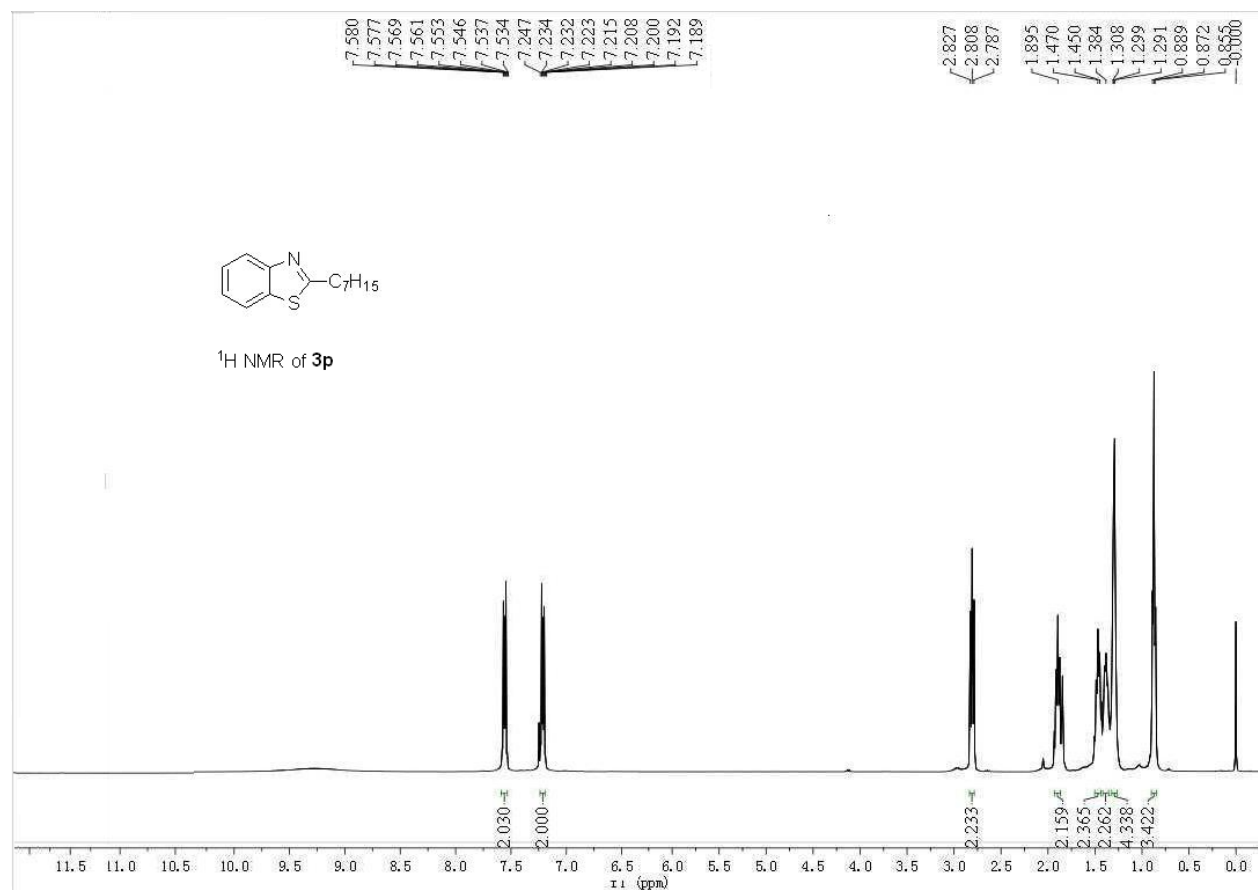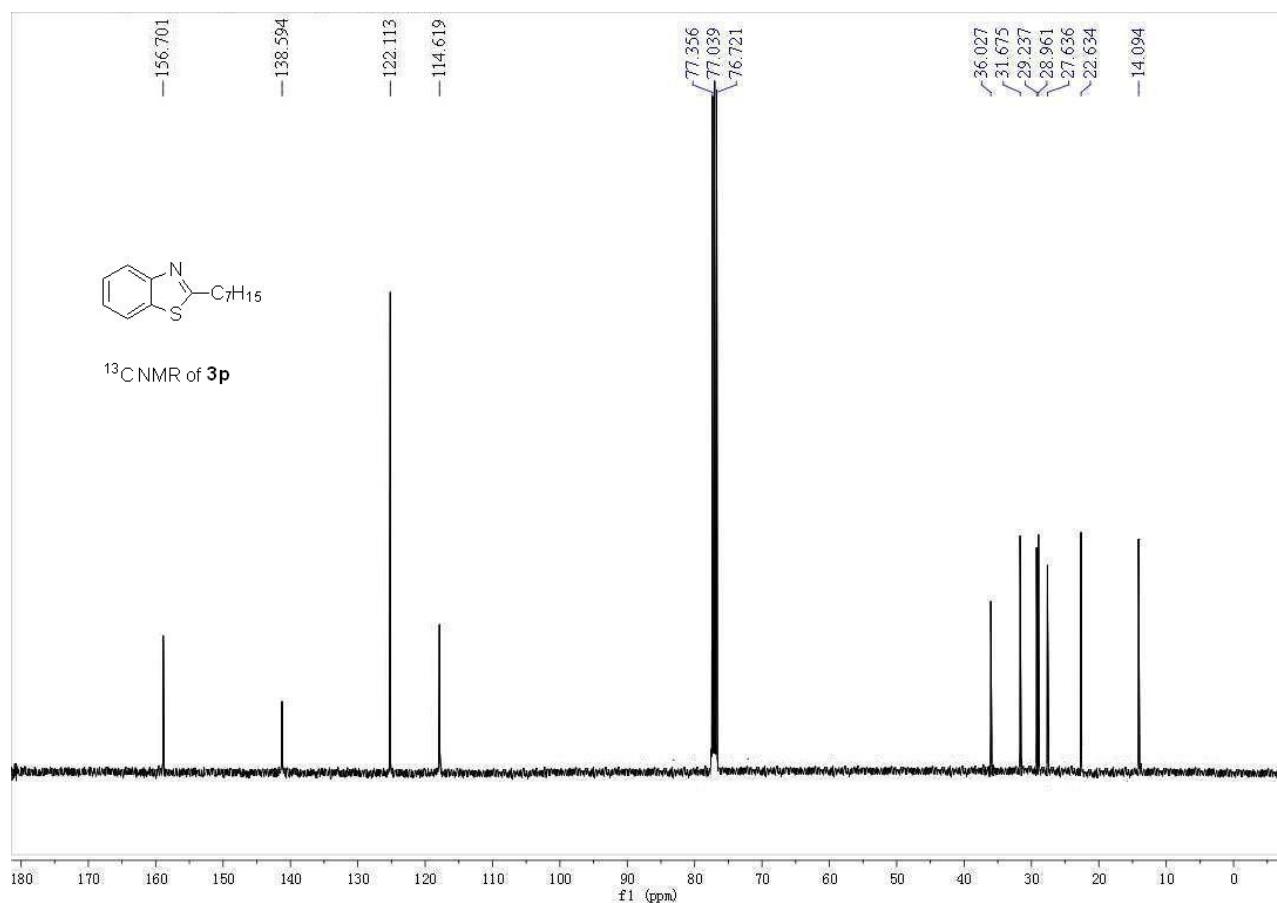

# <sup>1</sup>H and <sup>13</sup>C NMR spectra of 2-phenylbenzo[d]thiazole (3p)

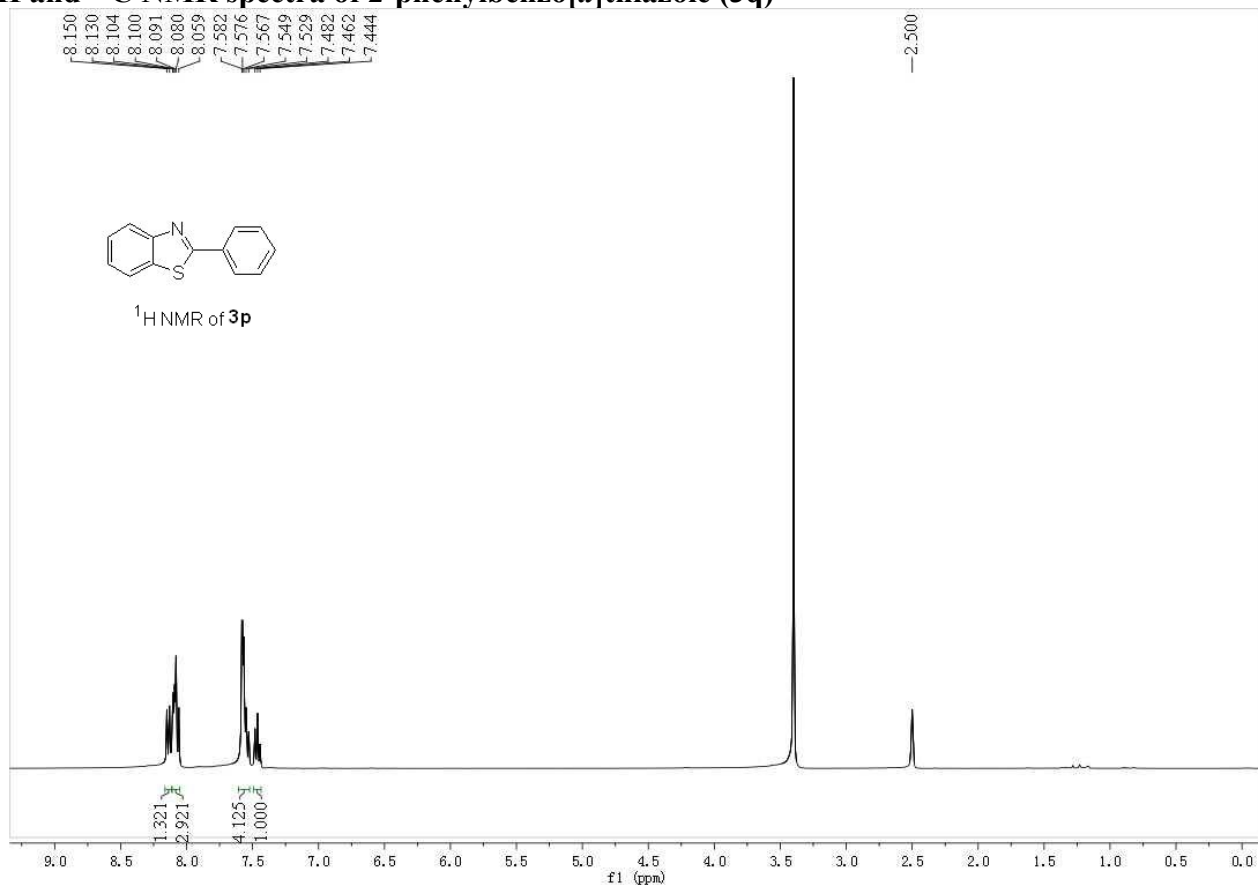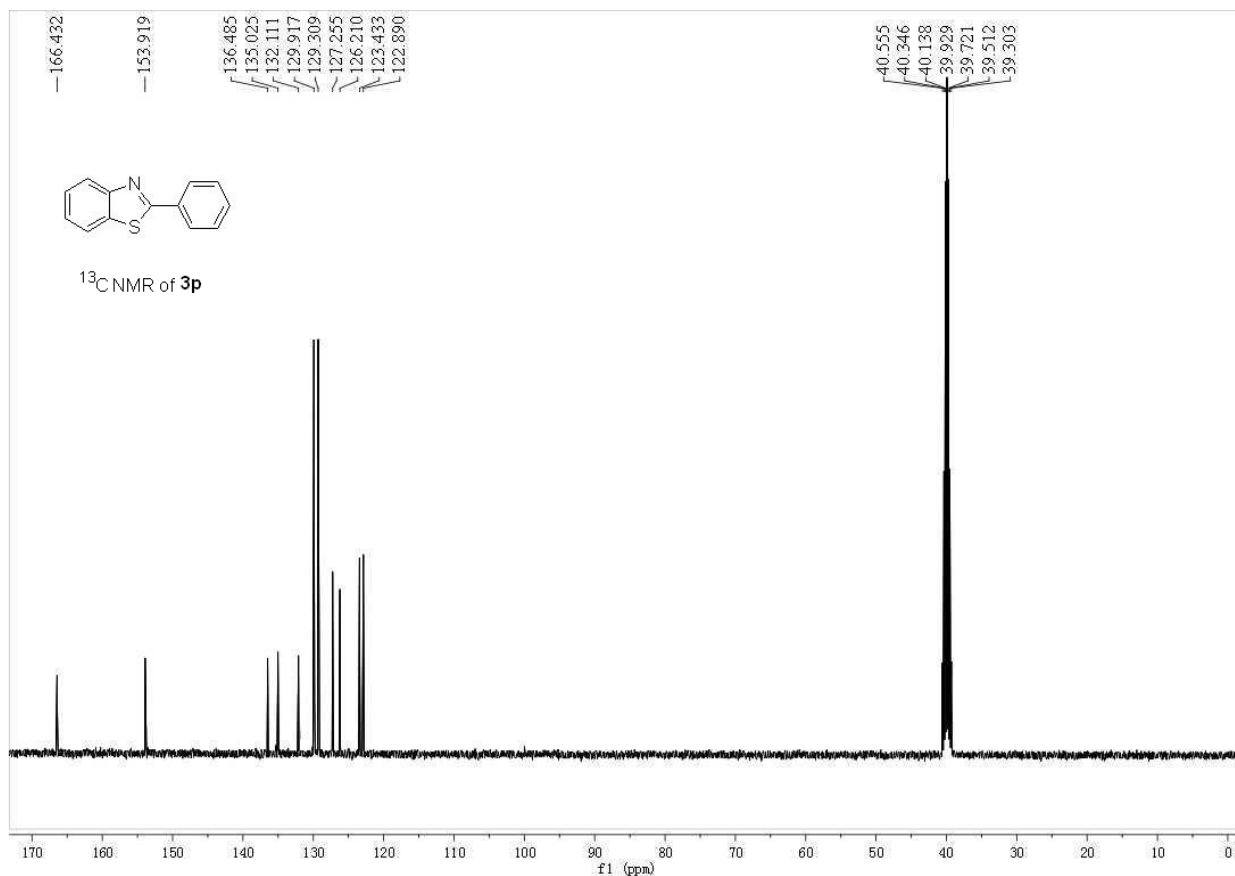

# <sup>1</sup>H and <sup>13</sup>C NMR spectra of 2-(pyridin-3-yl)quinazolin-4(3H)-one (3r)

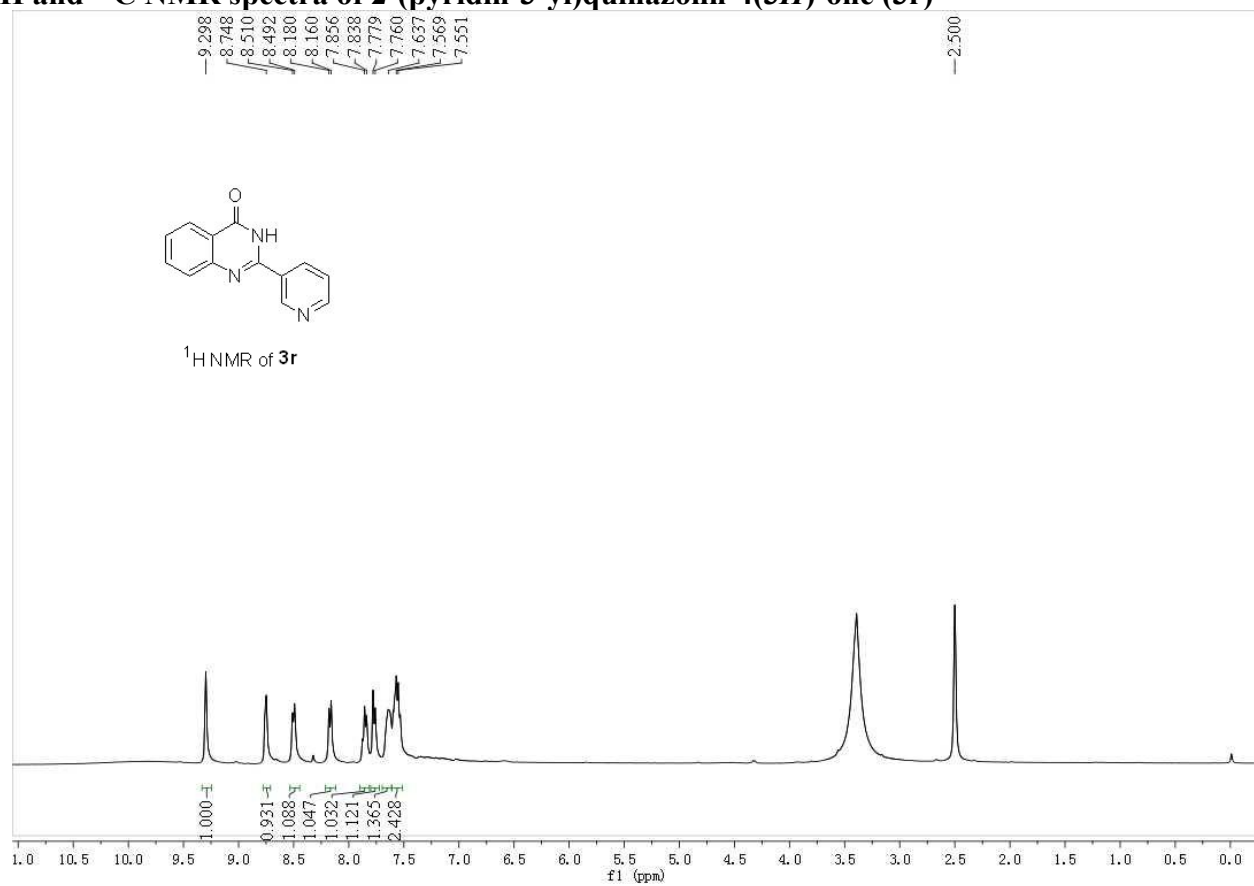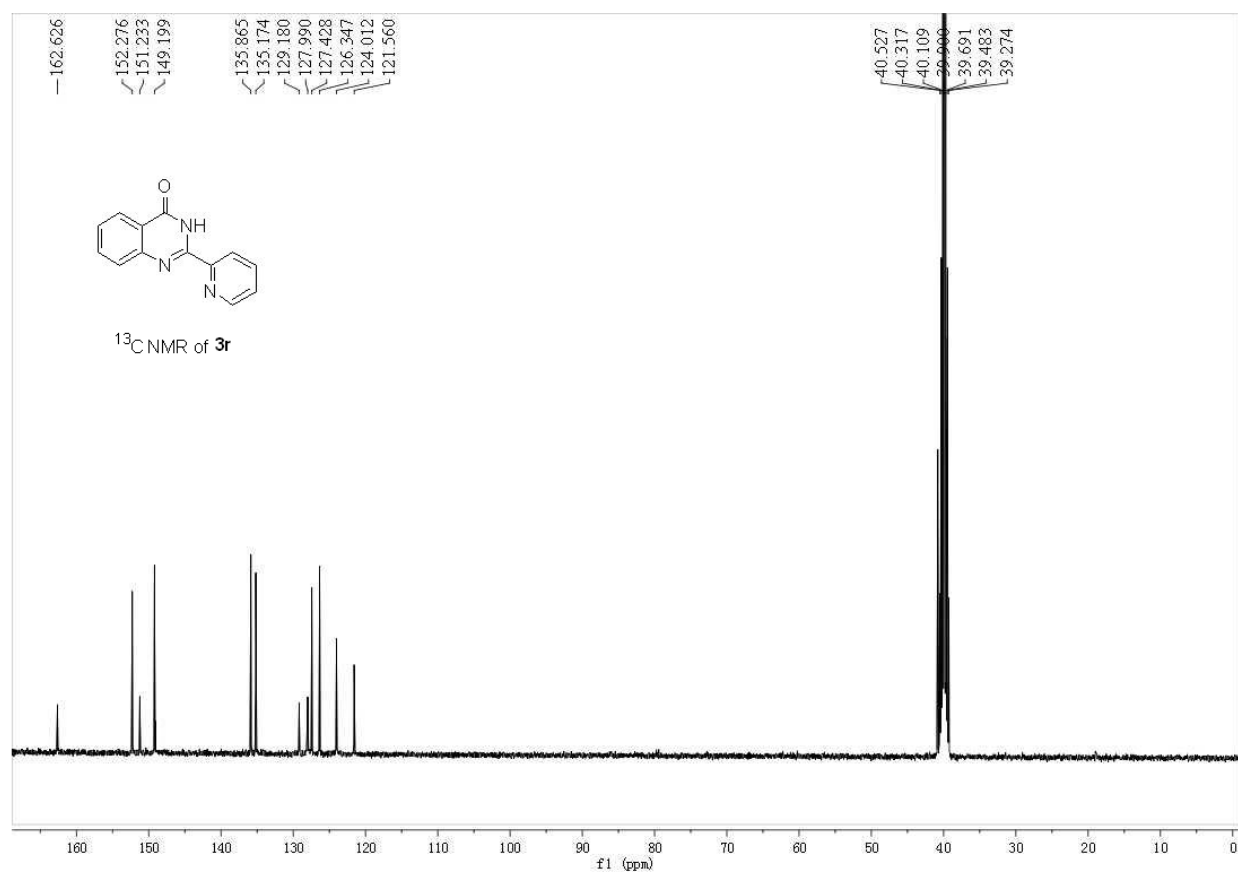

# <sup>1</sup>H and <sup>13</sup>C NMR spectra of 2-propyl-1H-benzo[d]imidazole (3s)

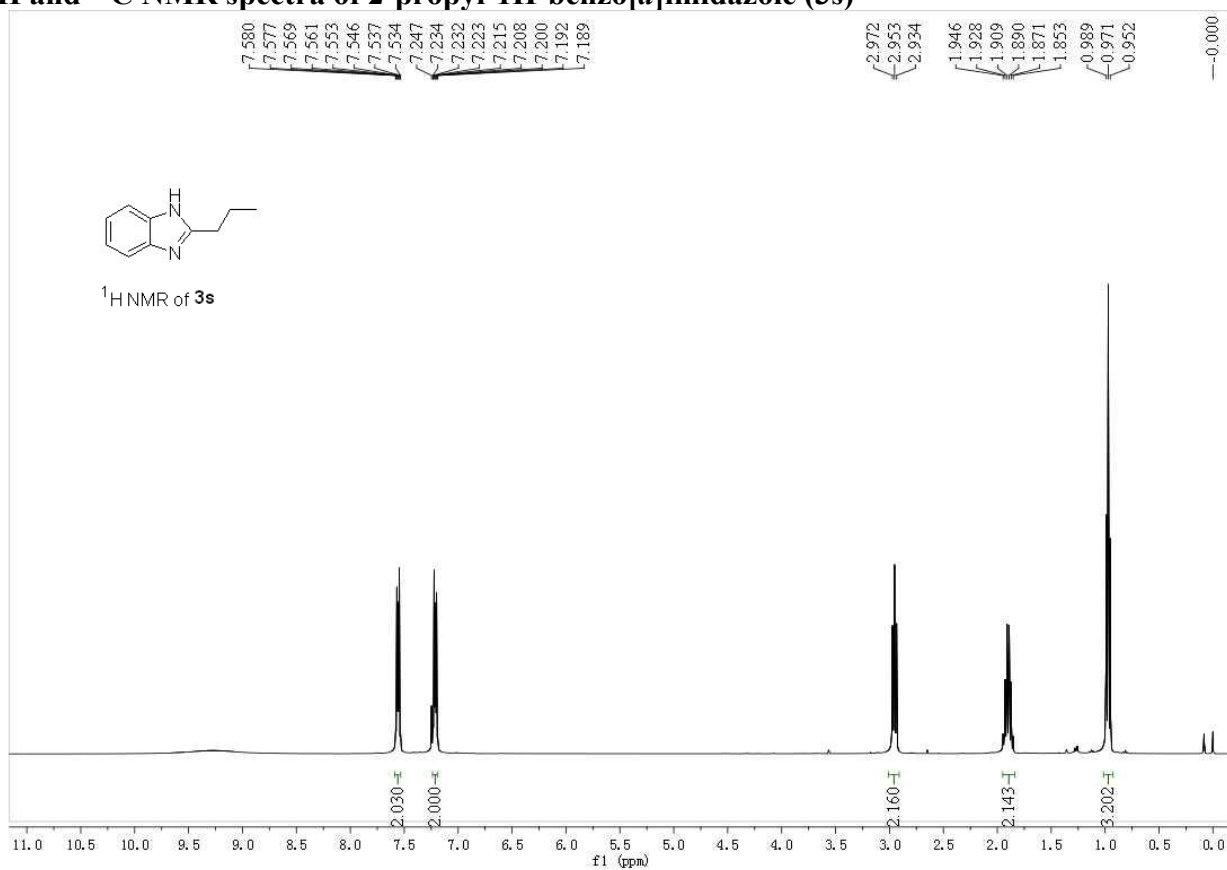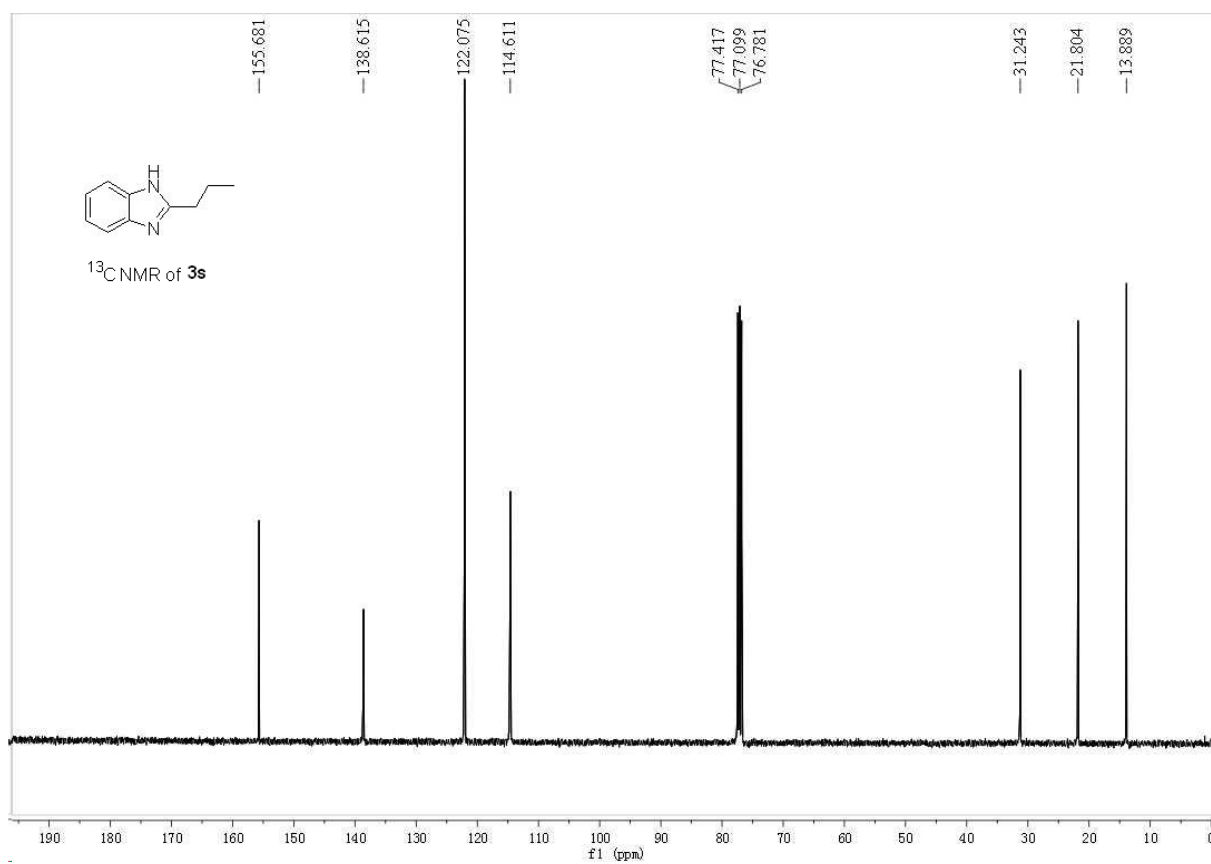

# <sup>1</sup>H and <sup>13</sup>C NMR spectra of 2-(4-chlorophenyl)-1H-benzo[d]imidazole (3t)

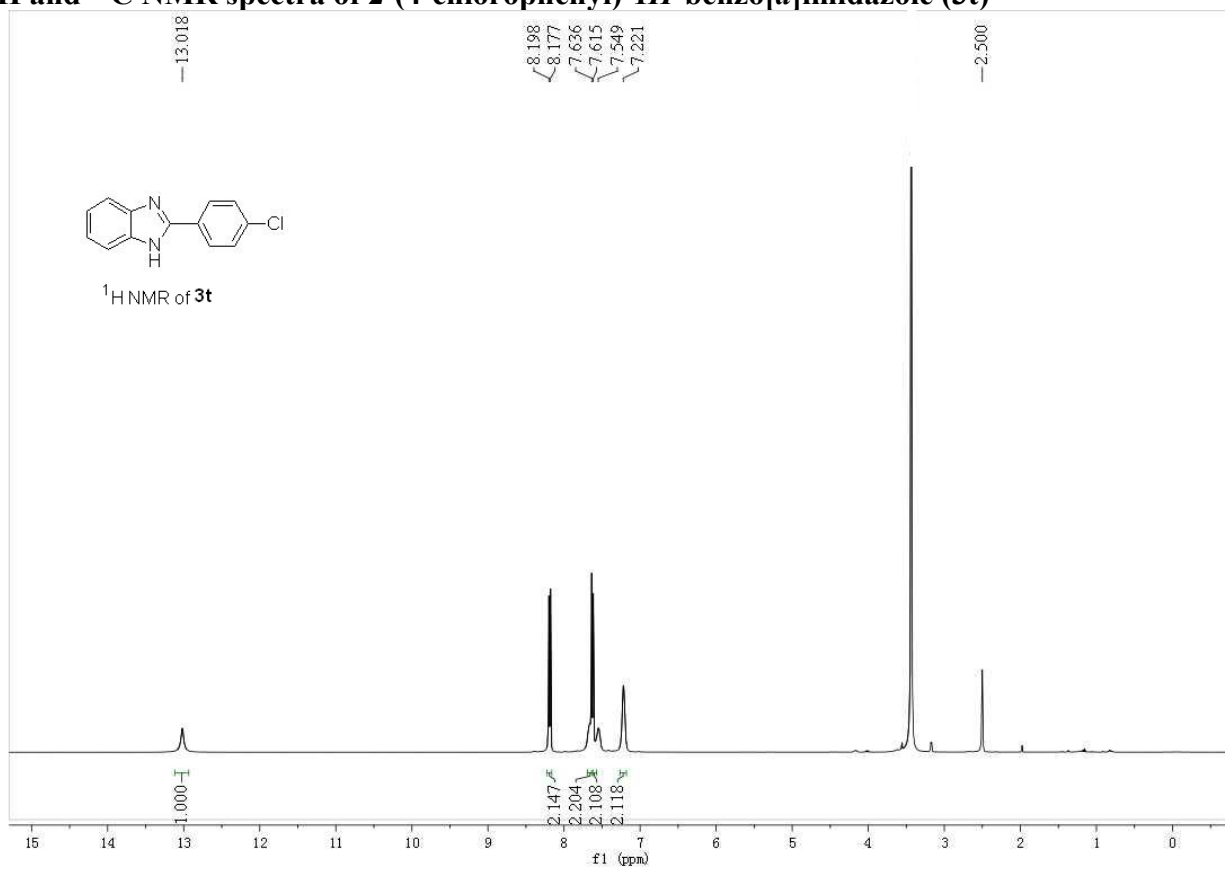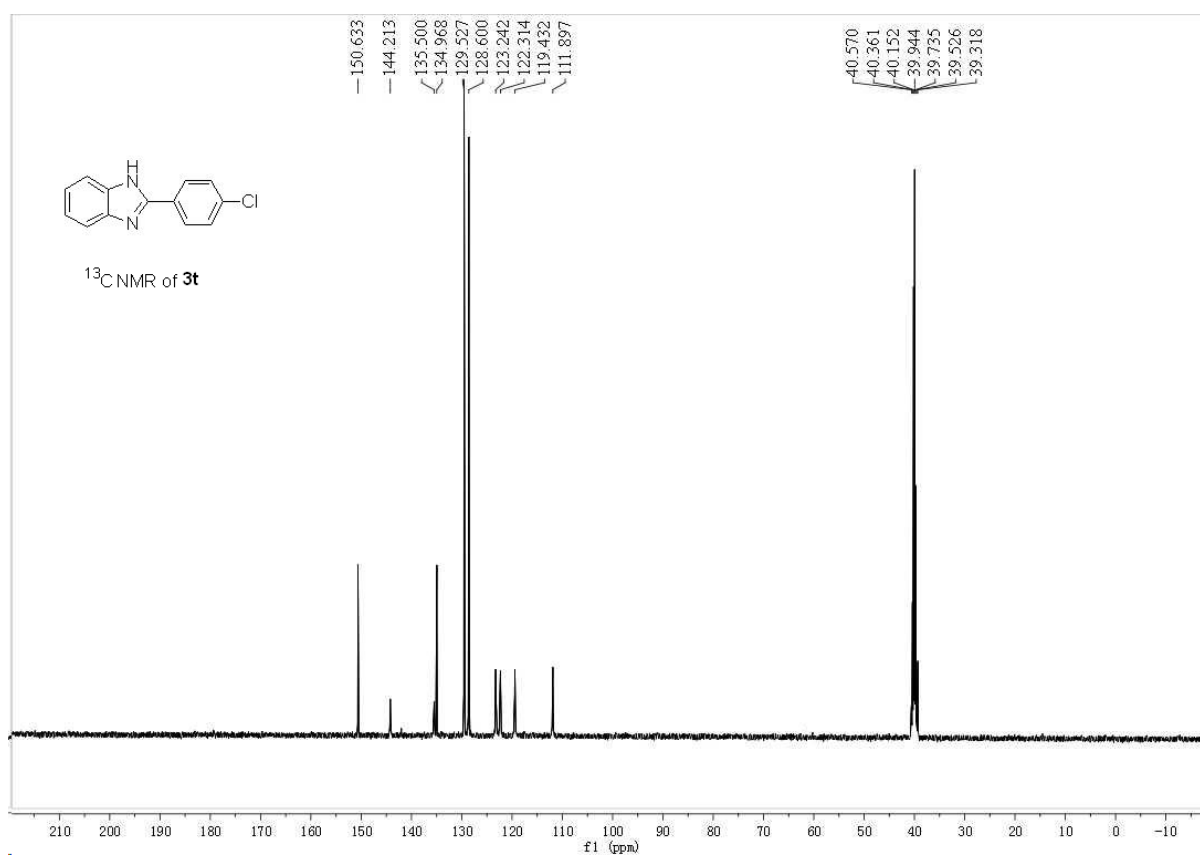



# <sup>1</sup>H and <sup>13</sup>C NMR spectra of 2-heptylbenzo[d]thiazole (3u)

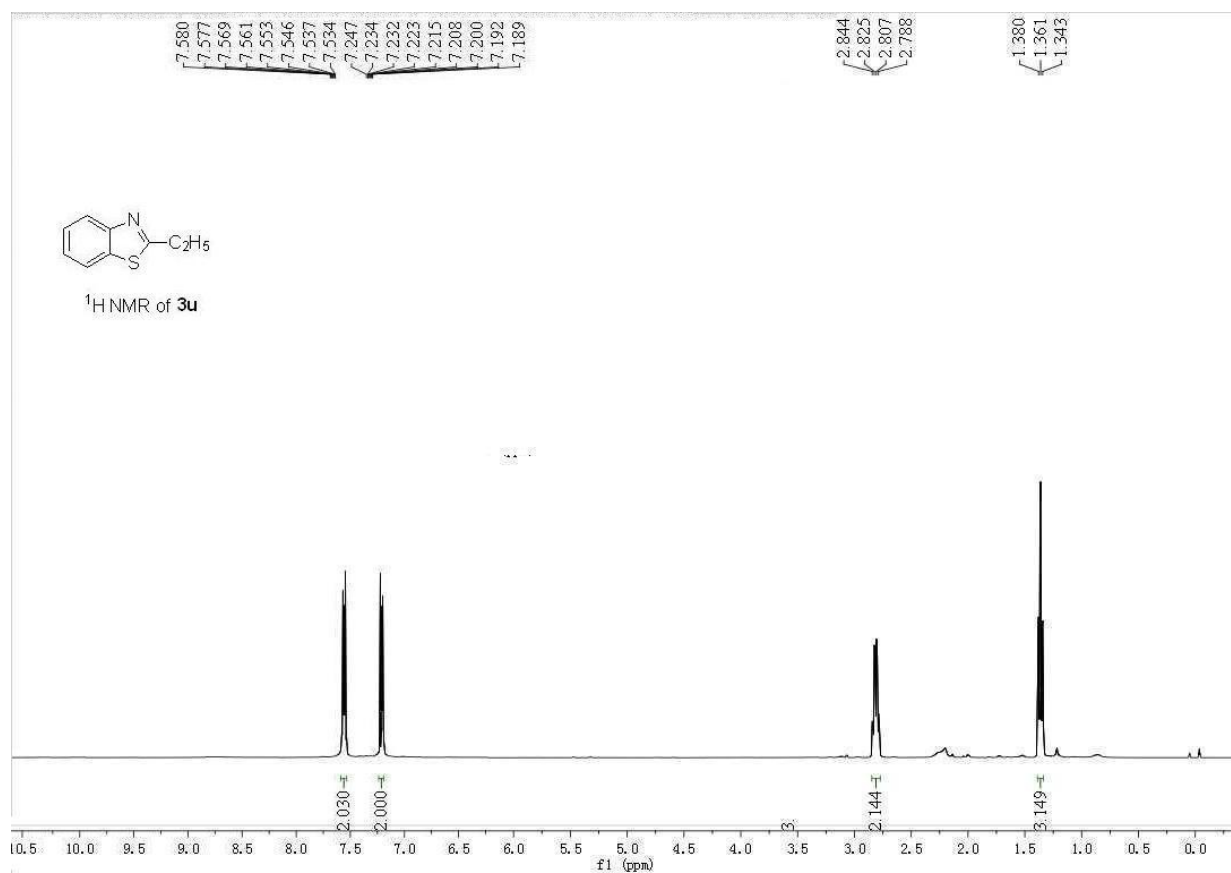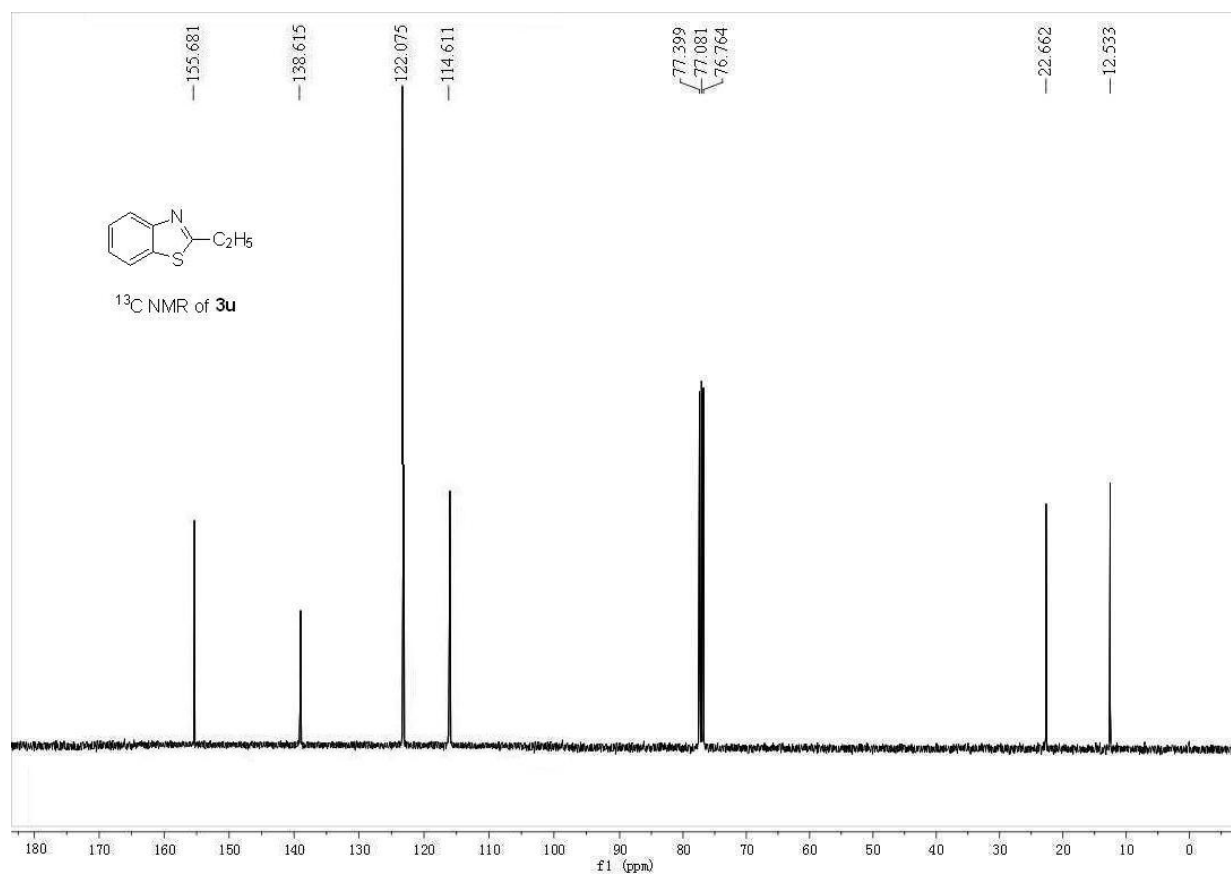

# <sup>1</sup>H and <sup>13</sup>C NMR spectra of 2-(3-methoxyphenyl)benzo[d]thiazole (3v)

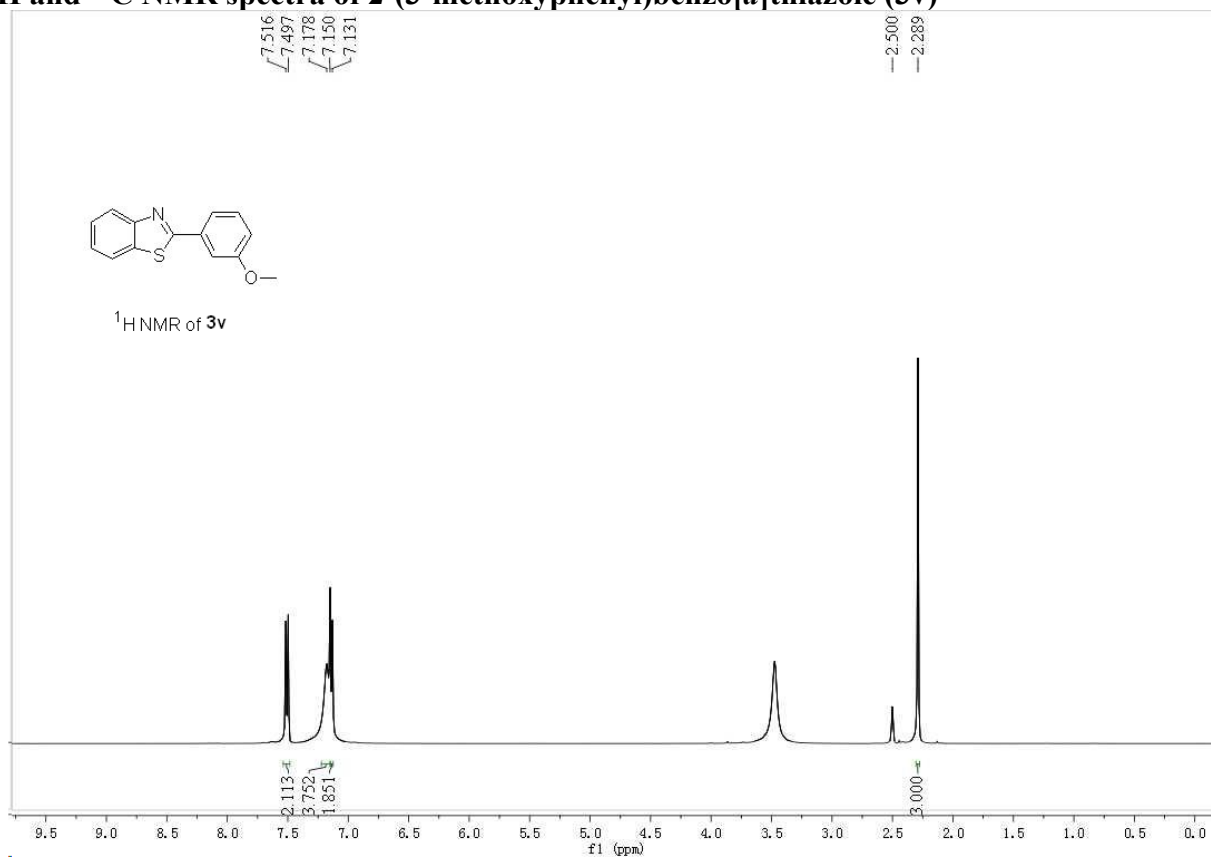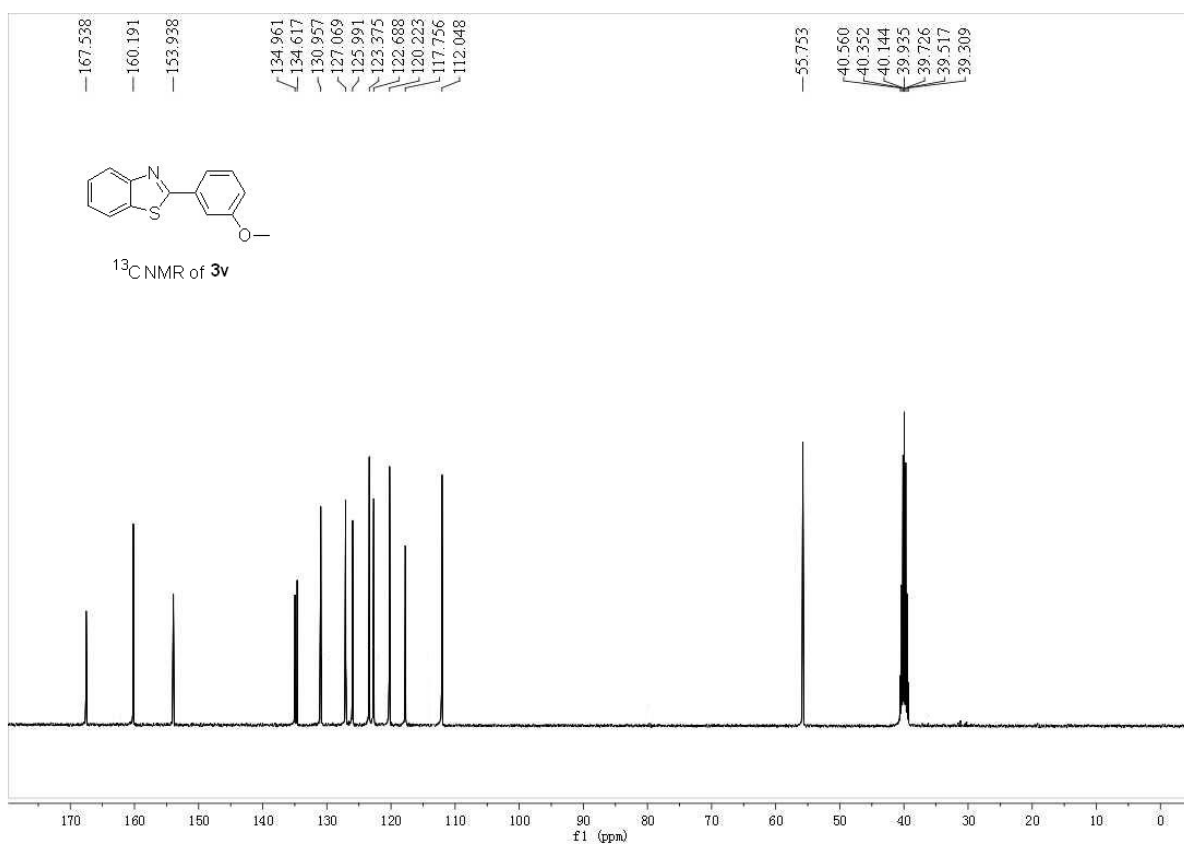

Supplement: c4ob00578c1.pdf [file c4ob00578c1.pdf]
